# Supplementary material for: The use of hierarchical clustering for the design of optimized monitoring networks
Source: Copernicus journal article supplement (doi:10.5194/acp-18-6543-2018), 2018-05-08
Supplement: Supplementary file 1 [file acp-18-6543-2018-supplement.pdf]

Supplement of Atmos. Chem. Phys., 18, 6543–6566, 2018  
<https://doi.org/10.5194/acp-18-6543-2018-supplement>  
© Author(s) 2018. This work is distributed under  
the Creative Commons Attribution 4.0 License.

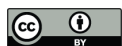

*Supplement of*

## **The use of hierarchical clustering for the design of optimized monitoring networks**

**Joana Soares et al.**

*Correspondence to:* Joana Soares ([joana.soares@canada.ca](mailto:joana.soares@canada.ca))

The copyright of individual parts of the supplement might differ from the CC BY 4.0 License.

# Supplement 1

5 **Table S1. Continuous NO<sub>2</sub> monitors included for the continuous network optimization analysis. Airshed acronyms: for the Airsheds West Central Airshed Society (WCAS), Wood Buffalo Environmental Association (WBEA), Fort Air Partnership (FAP), Alberta Capital Airshed Alliance (ACAA), Calgary Regional Airshed Zone (CRAZ), Peace Airshed Zone Association (PAZA), Palliser Airshed Society (PAS), Parkland Airshed Management Zone (PAMZ) and Lakeland Industrial Community Association (LICA).**

| <b>Name</b>         | <b>ID</b> | <b>latitude</b> | <b>longitude</b> | <b>Aished</b> |
|---------------------|-----------|-----------------|------------------|---------------|
| Edmonton Central    | 1028      | 53.5444         | -113.4988        | ACAA          |
| Fort McKay          | 1032      | 57.1894         | -111.6406        | WBEA          |
| Edmonton South      | 1036      | 53.5001         | -113.5260        | ACAA          |
| Calgary Northwest   | 1039      | 51.0792         | -114.1418        | CRAZ          |
| Lethbridge          | 1049      | 49.7162         | -112.8005        | AEP           |
| Violet Grove        | 1052      | 53.1423         | -115.1381        | WCAS          |
| Tomahawk            | 1053      | 53.3724         | -114.7686        | WCAS          |
| Carrot Creek        | 1054      | 53.6211         | -115.8692        | WCAS          |
| Steeper             | 1055      | 53.1324         | -117.0912        | WCAS          |
| Genesee             | 1057      | 53.3016         | -114.2211        | WCAS          |
| Meadows             | 1058      | 53.5300         | -114.6361        | WCAS          |
| Power               | 1059      | 53.6330         | -114.4199        | WCAS          |
| Edson               | 1062      | 53.5936         | -116.3928        | WCAS          |
| Athabasca Valley    | 1064      | 56.7336         | -111.3904        | WBEA          |
| Patricia McInnes    | 1070      | 56.7514         | -111.4767        | WBEA          |
| Millennium Mine     | 1075      | 56.9693         | -111.4007        | WBEA          |
| Fort McKay South    | 1076      | 57.1492         | -111.6423        | WBEA          |
| Caroline            | 1092      | 51.9472         | -114.6976        | PAMZ          |
| Red Deer-Riverside  | 1142      | 52.2986         | -113.7934        | PAMZ          |
| Redwater Industrial | 1156      | 53.8437         | -113.0992        | FAP           |
| Elk Island          | 1157      | 53.6824         | -112.8681        | FAP           |
| Ross Creek          | 1159      | 53.7162         | -113.1999        | FAP           |
| Range Road 220      | 1161      | 53.7524         | -113.1259        | FAP           |
| Lamont County       | 1162      | 53.7604         | -112.8802        | FAP           |
| Grande Prairie      | 1165      | 55.1767         | -118.8075        | PAZA          |
| Beaverlodge         | 1168      | 55.1963         | -119.3968        | PAZA          |
| Crescent Heights    | 1172      | 50.0490         | -110.6813        | PAS           |
| Calgary Central 2   | 1221      | 51.0469         | -114.0747        | CRAZ          |
| Anzac               | 1225      | 56.4493         | -111.0372        | WBEA          |
| CNRL Horizon        | 1226      | 57.3037         | -111.7395        | WBEA          |
| Wagner2             | 1241      | 53.4294         | -114.3806        | WCAS          |
| Shell Muskeg River  | 1244      | 57.2491         | -111.5087        | WBEA          |
| Maskwa              | 1248      | 54.6051         | -110.4527        | LICA          |
| ST.LINA             | 1250      | 54.2164         | -111.5023        | LICA          |

|                                    |      |         |           |      |
|------------------------------------|------|---------|-----------|------|
| Bruderheim                         | 2000 | 53.8001 | -112.9278 | FAP  |
| Fort Saskatchewan-92 St and 96 Ave | 2001 | 53.6988 | -113.2232 | FAP  |
| Woodcroft                          | 2002 | 53.5644 | -113.5626 | ACAA |

**Table S2. Continuous SO<sub>2</sub> monitors included for the continuous network optimization analysis. Airshed acronyms as described in Table S1.**

| <b>Name</b>         | <b>ID</b> | <b>latitude</b> | <b>longitude</b> | <b>Aished</b> |
|---------------------|-----------|-----------------|------------------|---------------|
| Edmonton East       | 1029      | 53.5482         | -113.3681        | ACAA          |
| Fort McKay          | 1032      | 57.1894         | -111.6406        | WBEA          |
| Lethbridge          | 1049      | 49.7162         | -112.8005        | AEP           |
| Violet Grove        | 1052      | 53.1423         | -115.1381        | WCAS          |
| Tomahawk            | 1053      | 53.3724         | -114.7686        | WCAS          |
| Carrot Creek        | 1054      | 53.6211         | -115.8692        | WCAS          |
| Steeper             | 1055      | 53.1324         | -117.0912        | WCAS          |
| Genesee             | 1057      | 53.3016         | -114.2211        | WCAS          |
| Meadows             | 1058      | 53.5300         | -114.6361        | WCAS          |
| Power               | 1059      | 53.6330         | -114.4199        | WCAS          |
| Edson               | 1062      | 53.5936         | -116.3928        | WCAS          |
| Breton              | 1063      | 53.0903         | -114.4606        | WCAS          |
| Athabasca Valley    | 1064      | 56.7336         | -111.3904        | WBEA          |
| Mildred Lake        | 1066      | 57.0500         | -111.5641        | WBEA          |
| Mannix              | 1069      | 56.9680         | -111.4821        | WBEA          |
| Patricia McInnes    | 1070      | 56.7514         | -111.4767        | WBEA          |
| Lower Camp          | 1074      | 57.0325         | -111.5064        | WBEA          |
| Millennium Mine     | 1075      | 56.9693         | -111.4007        | WBEA          |
| Fort McKay South    | 1076      | 57.1492         | -111.6423        | WBEA          |
| Caroline            | 1092      | 51.9472         | -114.6976        | PAMZ          |
| Red Deer-Riverside  | 1142      | 52.2986         | -113.7934        | PAMZ          |
| Redwater Industrial | 1156      | 53.8437         | -113.0992        | FAP           |
| Elk Island          | 1157      | 53.6824         | -112.8681        | FAP           |
| Ross Creek          | 1159      | 53.7162         | -113.1999        | FAP           |
| Range Road 220      | 1161      | 53.7524         | -113.1259        | FAP           |
| Lamont County       | 1162      | 53.7604         | -112.8802        | FAP           |
| Grande Prairie      | 1165      | 55.1767         | -118.8075        | PAZA          |
| Evergreen Park      | 1166      | 55.1175         | -118.7647        | PAZA          |
| Smoky Heights       | 1167      | 55.4028         | -118.2814        | PAZA          |
| Beaverlodge         | 1168      | 55.1963         | -119.3968        | PAZA          |
| Valleyview          | 1170      | 54.9405         | -117.2153        | PAZA          |
| Crescent Heights    | 1172      | 50.0490         | -110.6813        | PAS           |
| Anzac               | 1225      | 56.4493         | -111.0372        | WBEA          |
| CNRL Horizon        | 1226      | 57.3037         | -111.7395        | WBEA          |
| Wagner2             | 1241      | 53.4294         | -114.3806        | WCAS          |

|                                    |      |         |           |        |
|------------------------------------|------|---------|-----------|--------|
| Shell Muskeg River                 | 1244 | 57.2491 | -111.5087 | WBEA   |
| Maskwa                             | 1248 | 54.6051 | -110.4527 | LICA   |
| ST.LINA                            | 1250 | 54.2164 | -111.5023 | N_LICA |
| Bruderheim                         | 2000 | 53.8001 | -112.9278 | FAP    |
| Fort Saskatchewan-92 St and 96 Ave | 2001 | 53.6988 | -113.2232 | FAP    |
| Woodcroft                          | 2002 | 53.5644 | -113.5626 | ACAA   |

**Table S3. Passive and continuous NO<sub>2</sub> monitors included for the passive network optimization analysis, ID ending in a “(C)” is a continuous monitor and with a “(P)” a passive monitor. Airshed acronyms as described in Table S1.**

| Name                               | ID                  | Latitude | longitude | Airshed |
|------------------------------------|---------------------|----------|-----------|---------|
| Edmonton Central                   | 1028C               | 53.5444  | -113.4988 | ACAA    |
| Edmonton East                      | 1029C               | 53.5482  | -113.3681 | ACAA    |
| Edmonton South                     | 1036C               | 53.5001  | -113.5260 | ACAA    |
| Lethbridge                         | 1049C               | 49.7162  | -112.8005 | AEP     |
| Calgary Northwest                  | 1039C               | 51.0792  | -114.1418 | CRAZ    |
| Redwater Industrial                | 1156C               | 53.8437  | -113.0992 | FAP     |
| Elk Island                         | 1157C               | 53.6824  | -112.8681 | FAP     |
| Ross Creek                         | 1159C               | 53.7162  | -113.1999 | FAP     |
| Range Road 220                     | 1161C               | 53.7524  | -113.1259 | FAP     |
| Lamont County                      | 1162C               | 53.7604  | -112.8802 | FAP     |
| Fort Saskatchewan-92 St and 96 Ave | 2001C               | 53.6988  | -113.2232 | FAP     |
| Redwater Industrial                | 1156C               | 53.8437  | -113.0992 | FAP     |
| Therien                            | 1176P               | 54.3108  | -111.2261 | LICA    |
| Flat Lake                          | 1177P               | 54.0726  | -111.2051 | LICA    |
| Lake Eliza                         | 1178P               | 53.8242  | -111.1661 | LICA    |
| Muriel-Kehiwin                     | 1181P               | 54.0934  | -110.7444 | LICA    |
| Dupre                              | 1182P               | 54.3346  | -110.7796 | LICA    |
| La Corey                           | 1183P               | 54.4997  | -110.8179 | LICA    |
| Primrose                           | 1186P               | 54.7585  | -110.4522 | LICA    |
| Maskwa                             | 1248C,1187P         | 54.6052  | -110.4526 | LICA    |
| Frog Lake                          | 1189P               | 53.8907  | -110.3842 | LICA    |
| Clear Range                        | 1190P               | 53.5565  | -110.1542 | LICA    |
| Fishing Lake                       | 1191P               | 53.9030  | -110.0762 | LICA    |
| Beaverdam                          | 1192P               | 54.1693  | -110.2328 | LICA    |
| Cold Lake South                    | 1174C, 1193P, 1227P | 54.4137  | -110.2328 | LICA    |
| Fort George                        | 1195P               | 53.8783  | -110.7481 | LICA    |
| Town of Bonnyville                 | 1199P               | 54.2709  | -110.7435 | LICA    |
| St. Lina                           | 1250C,1252P         | 54.2160  | -111.5033 | LICA    |
| PAS 18                             | 9936P               | 49.9949  | -110.6292 | PAMZ    |
| Bow Summit                         | 9938P               | 51.7083  | -116.4792 | PAMZ    |
| Parker Ridge                       | 9939P               | 52.1173  | -115.4069 | PAMZ    |
| Bighorn                            | 9940P               | 52.4300  | -116.2000 | PAMZ    |

|                          |          |         |           |      |
|--------------------------|----------|---------|-----------|------|
| Sunchild                 | 9941P    | 52.6471 | -115.4269 | PAMZ |
| Baseline Mountain        | 9942P    | 52.1704 | -115.4183 | PAMZ |
| Limestone Mountain       | 9943P    | 51.8755 | -115.4528 | PAMZ |
| Fallen Timber            | 9945P    | 51.6126 | -115.0227 | PAMZ |
| Bearberry                | 9946P    | 51.8820 | -115.0010 | PAMZ |
| Ricinus                  | 9947P    | 52.1508 | -114.9777 | PAMZ |
| Twin Lakes               | 9948P    | 52.4054 | -115.0237 | PAMZ |
| Rimbey                   | 9949P    | 52.6465 | -114.3729 | PAMZ |
| Leslieville              | 9950P    | 52.4101 | -114.5769 | PAMZ |
| Raven River              | 9951P    | 52.1421 | -114.5799 | PAMZ |
| Sundre                   | 9952P    | 51.8825 | -114.5697 | PAMZ |
| South Elkton             | 9953P    | 51.6205 | -114.5687 | PAMZ |
| Bottrel                  | 9954P    | 51.4093 | -114.3944 | PAMZ |
| Crossfield-Carstairs     | 9955P    | 51.4819 | -113.9986 | PAMZ |
| Netook-Olds              | 9956P    | 51.8751 | -114.1437 | PAMZ |
| Sylvan Lake              | 9958P    | 52.4068 | -111.1534 | PAMZ |
| Range Rd                 | 9959P    | 52.5627 | -113.6261 | PAMZ |
| Mayton                   | 9960P    | 51.8863 | -113.6913 | PAMZ |
| Sunnyslope               | 9961P    | 51.6204 | -113.6661 | PAMZ |
| Grainger                 | 9962P    | 51.4379 | -113.3338 | PAMZ |
| Elnora                   | 9963P    | 52.0339 | -113.3379 | PAMZ |
| Alix                     | 9964P    | 52.4118 | -113.3275 | PAMZ |
| Samson                   | 9965P    | 52.7268 | -113.1775 | PAMZ |
| Ferrybank                | 9966P    | 52.7627 | -113.9942 | PAMZ |
| Pakkwaw                  | 9967P    | 52.1430 | -113.7187 | PAMZ |
| Kersey                   | 9968P    | 51.3580 | -113.8141 | PAMZ |
| Panther River            | 9970P    | 51.6075 | -115.3893 | PAMZ |
| Markerville              | 9971P    | 42.1446 | -114.1270 | PAMZ |
| Caroline                 | 1092C,P  | 51.9469 | 114.6974  | PAMZ |
| Red Deer Riverside       | 1142C, P | 52.2987 | 113.8103  | PAMZ |
| Crescent Heights, PAS 19 | 1172C,P  | 50.0491 | -110.6814 | PAS  |
| SM7                      | 9921P    | 55.6857 | -111.8154 | PAS  |
| PAS 1                    | 9922P    | 50.3970 | -110.1216 | PAS  |
| PAS 2                    | 9923P    | 50.6951 | -110.1299 | PAS  |
| PAS 3                    | 9924P    | 51.2288 | -110.5160 | PAS  |
| PAS 4                    | 9925P    | 51.6044 | -110.2091 | PAS  |
| PAS 6                    | 9926P    | 51.2114 | -111.9586 | PAS  |
| PAS 7                    | 9927P    | 50.7315 | -112.4055 | PAS  |
| PAS 8                    | 9928P    | 50.7483 | -111.0208 | PAS  |
| PAS 11                   | 9929P    | 50.5897 | -111.8508 | PAS  |
| PAS 12                   | 9930P    | 50.4347 | -111.7000 | PAS  |
| PAS 13                   | 9931P    | 49.8422 | -111.4968 | PAS  |
| PAS 14                   | 9932P    | 49.8432 | -111.0945 | PAS  |

|                                |         |         |           |      |
|--------------------------------|---------|---------|-----------|------|
| PAS 15                         | 9933P   | 49.5233 | -111.4722 | PAS  |
| PAS 16                         | 9934P   | 49.1753 | -110.9475 | PAS  |
| PAS 17                         | 9935P   | 49.2208 | -110.2081 | PAS  |
| Beaverlodge                    | 1168C   | 55.1963 | -119.3968 | PAZA |
| Grande Prairie                 | 1165C   | 55.1767 | -118.8075 | PAZA |
| Fort McKay-Bertha Ganter       | 1032C,P | 57.1894 | -111.6406 | WBEA |
| Fort McMurray-Athabasca Valley | 1064C   | 56.7336 | -111.3904 | WBEA |
| Fort McMurray-Patricia McInnes | 1070C   | 56.7514 | -111.4767 | WBEA |
| Fort Chipewyan                 | 1071C   | 58.7092 | -111.1750 | WBEA |
| Millennium Mine                | 1075C   | 56.9693 | -111.4007 | WBEA |
| Fort McKay South               | 1076C   | 57.1492 | -111.6423 | WBEA |
| Anzac                          | 1225C   | 56.4493 | -111.0372 | WBEA |
| CNRL Horizon                   | 1226C   | 57.3037 | -111.7395 | WBEA |
| Shell Muskeg River             | 1244C   | 57.2491 | -111.5087 | WBEA |
| AH3                            | 9901P   | 56.6964 | -111.1223 | WBEA |
| AH8                            | 9902P   | 57.1019 | -112.0754 | WBEA |
| BM10                           | 9903P   | 57.3201 | -112.3970 | WBEA |
| BM11                           | 9904P   | 57.6913 | -111.9095 | WBEA |
| BM7                            | 9905P   | 58.0582 | -112.2814 | WBEA |
| JP101                          | 9906P   | 56.5395 | -112.2756 | WBEA |
| JP102                          | 9907P   | 56.9096 | -111.5407 | WBEA |
| JP104                          | 9908P   | 57.1190 | -111.4254 | WBEA |
| JP107                          | 9909P   | 57.8903 | -111.4352 | WBEA |
| JP205                          | 9910P   | 57.8378 | -110.4490 | WBEA |
| JP210                          | 9911P   | 56.2728 | -110.4487 | WBEA |
| JP212                          | 9912P   | 57.0537 | -111.4092 | WBEA |
| JP213                          | 9913P   | 57.0473 | -109.7497 | WBEA |
| NE10                           | 9914P   | 56.6085 | -110.1926 | WBEA |
| NE11                           | 9915P   | 57.2879 | -111.2171 | WBEA |
| NE7                            | 9916P   | 57.1467 | -110.8663 | WBEA |
| SM8                            | 9917P   | 56.2016 | -111.1753 | WBEA |
| WF4                            | 9918P   | 57.1479 | -111.9840 | WBEA |
| AH7                            | 9919P   | 56.8298 | -111.7678 | WBEA |
| R2                             | 9920P   | 56.8298 | -111.7678 | WBEA |
| Violet Grove                   | 1052C   | 53.1423 | -115.1381 | WCAS |
| Tomahawk                       | 1053C   | 53.3724 | -114.7686 | WCAS |
| Carrot Creek                   | 1054C   | 53.6211 | -115.8692 | WCAS |
| Steeper                        | 1055C   | 53.1324 | -117.0912 | WCAS |
| Genesee                        | 1057C   | 53.3016 | -114.2211 | WCAS |
| Meadows                        | 1058C   | 53.5300 | -114.6361 | WCAS |
| Power                          | 1059C   | 53.6330 | -114.4199 | WCAS |
| Breton                         | 1063C   | 53.0903 | -114.4606 | WCAS |
| Wagner2                        | 1241C   | 53.4294 | -114.3806 | WCAS |

**Table S4. Passive and continuous SO<sub>2</sub> monitors included for the passive network optimization analysis. ID ending in a “(C)” is a continuous monitor and with a “(P)” a passive monitor. Airshed acronyms are as described in Table S1.**

| <b>Name</b>                        | <b>ID</b> | <b>Latitude</b> | <b>longitude</b> | <b>Airshed</b> |
|------------------------------------|-----------|-----------------|------------------|----------------|
| Edmonton East                      | 1029C     | 53.5482         | -113.3681        | ACAA           |
| Edmonton South                     | 1036C     | 53.5001         | -113.5260        | ACAA           |
| Lethbridge                         | 1049C     | 49.7162         | -112.8005        | AEP            |
| Redwater Industrial                | 1156C     | 53.8437         | -113.0992        | FAP            |
| Elk Island                         | 1157C     | 53.6824         | -112.8681        | FAP            |
| Ross Creek                         | 1159C     | 53.7162         | -113.1999        | FAP            |
| Range Road 220                     | 1161C     | 53.7524         | -113.1259        | FAP            |
| Lamont County                      | 1162C     | 53.7604         | -112.8802        | FAP            |
| Fort Saskatchewan-92 St and 96 Ave | 2001C     | 53.6988         | -113.2232        | FAP            |
| FAP-01                             | 1258P     | 113.2489        | 53.5952          | FAP            |
| FAP-02                             | 1259P     | 113.1019        | 53.5885          | FAP            |
| FAP-03                             | 1260P     | 53.8667         | -112.8270        | FAP            |
| FAP-04                             | 1261P     | 112.7762        | 54.0988          | FAP            |
| FAP-05                             | 1262P     | 113.1331        | 54.1523          | FAP            |
| FAP-07                             | 1264P     | 113.4242        | 53.8338          | FAP            |
| FAP-08                             | 1265P     | 113.4242        | 53.8338          | FAP            |
| FAP-10                             | 1267P     | 53.7512         | -113.1883        | FAP            |
| FAP-11                             | 1268P     | 53.8320         | -113.0489        | FAP            |
| FAP-12                             | 1269P     | 53.8658         | -113.0254        | FAP            |
| FAP-15                             | 1272P     | 53.8044         | -112.9765        | FAP            |
| FAP-18                             | 1275P     | 53.7525         | -113.0005        | FAP            |
| FAP-20                             | 1277P     | 53.7594         | -112.8767        | FAP            |
| FAP-21                             | 1278P     | 53.7085         | -112.9754        | FAP            |
| FAP-22                             | 1279P     | 53.6876         | -112.8769        | FAP            |
| FAP-23                             | 1280P     | 53.6633         | -112.9265        | FAP            |
| FAP-24                             | 1281P     | 53.8187         | -113.0857        | FAP            |
| FAP-26                             | 1283P     | 53.8035         | -113.1495        | FAP            |
| FAP-27                             | 1284P     | 53.8813         | -113.0004        | FAP            |
| FAP-28                             | 1285P     | 53.9045         | -112.9508        | FAP            |
| FAP-29                             | 1286P     | 53.9491         | -112.9483        | FAP            |
| FAP-30                             | 1287P     | 53.9343         | -113.1001        | FAP            |
| FAP-31                             | 1288P     | 53.8107         | -113.1084        | FAP            |
| FAP-32                             | 1289P     | 53.8333         | -113.1322        | FAP            |
| FAP-33                             | 1290P     | 53.7451         | -113.2482        | FAP            |
| FAP-34                             | 1291P     | 53.7454         | -113.4836        | FAP            |
| FAP-35                             | 1292P     | 53.8251         | -113.4789        | FAP            |
| FAP-37                             | 1294P     | 53.8631         | -113.2236        | FAP            |
| FAP-38                             | 1295P     | 53.9218         | -112.6787        | FAP            |

|                    |                     |         |           |      |
|--------------------|---------------------|---------|-----------|------|
| FAP-39             | 1296P               | 53.8325 | -112.6783 | FAP  |
| FAP-40             | 1297P               | 53.7452 | -112.7029 | FAP  |
| FAP-42             | 1299P               | 54.0070 | -113.0245 | FAP  |
| FAP-43             | 1300P               | 53.7452 | -113.1671 | FAP  |
| FAP-45             | 1301P               | 53.7745 | -113.0639 | FAP  |
| FAP-46             | 1302P               | 53.7128 | -113.0693 | FAP  |
| FAP-47             | 1303P               | 53.5414 | -112.7178 | FAP  |
| FAP-48             | 1304P               | 54.0935 | -113.0287 | FAP  |
| FAP-49             | 1305P               | 54.0071 | -112.8640 | FAP  |
| FAP-50             | 1306P               | 54.1805 | -112.8479 | FAP  |
| FAP-51             | 1307P               | 54.2388 | -112.7258 | FAP  |
| FAP-52             | 1308P               | 54.2682 | -113.0519 | FAP  |
| FAP-53             | 1309P               | 54.2681 | -113.4004 | FAP  |
| FAP-54             | 1310P               | 54.1815 | -113.2237 | FAP  |
| FAP-55             | 1311P               | 54.1019 | -113.3748 | FAP  |
| FAP-56             | 1312P               | 54.0071 | -113.2248 | FAP  |
| FAP-57             | 1313P               | 53.8012 | -113.0509 | FAP  |
| Maskwa             | 1248C,1187P         | 54.6052 | -110.4526 | LICA |
| Therien            | 1176P               | 54.3108 | -111.2261 | LICA |
| Flat Lake          | 1177P               | 54.0726 | -111.2051 | LICA |
| Lake Eliza         | 1178P               | 53.8242 | -111.1661 | LICA |
| Telegraph Creek    | 1179P               | 53.7520 | -110.5740 | LICA |
| Muriel-Kehiwin     | 1181P               | 54.0934 | -110.7444 | LICA |
| Dupre              | 1182P               | 54.3346 | -110.7796 | LICA |
| La Corey           | 1183P               | 54.4997 | -110.8179 | LICA |
| Wolf Lake          | 1184P               | 54.6954 | -110.8425 | LICA |
| Foster Creek       | 1185P               | 55.0334 | -110.5045 | LICA |
| Primrose           | 1186P               | 54.7585 | -110.4522 | LICA |
| Frog Lake          | 1189P               | 53.8907 | -110.3842 | LICA |
| Clear Range        | 1190P               | 53.5565 | -110.1542 | LICA |
| Fishing Lake       | 1191P               | 53.9030 | -110.0762 | LICA |
| Beaverdam          | 1192P               | 54.1693 | -110.2328 | LICA |
| Cold Lake South    | 1174C, 1193P, 1227P | 54.4137 | -110.2328 | LICA |
| Medley             | 1194P               | 54.7243 | -110.0662 | LICA |
| Fort George        | 1195P               | 53.8783 | -110.7481 | LICA |
| Burnt Lake         | 1196P               | 54.7946 | -110.3444 | LICA |
| Mahihkan           | 1197P               | 54.6230 | -110.5089 | LICA |
| Hilda Lake         | 1198P               | 54.5769 | -110.3690 | LICA |
| Town of Bonnyville | 1199P               | 54.2709 | -110.7435 | LICA |
| St. Lina           | 1250C,1252P         | 54.2160 | -111.5033 | LICA |
| Grande Prairie     | 1165C               | 55.1767 | -118.8075 | PAZA |
| Evergreen Park     | 1166C               | 55.1175 | -118.7647 | PAZA |
| Smoky Heights      | 1167C               | 55.4028 | -118.2814 | PAZA |



|                                |         |         |           |      |
|--------------------------------|---------|---------|-----------|------|
| Beaverlodge                    | 1168C   | 55.1963 | -119.3968 | PAZA |
| Valleyview                     | 1170C   | 54.9405 | -117.2153 | PAZA |
| Fort McKay-Bertha Ganter       | 1032C,P | 57.1894 | -111.6406 | WBEA |
| Fort McMurray-Athabasca Valley | 1064C   | 56.7336 | -111.3904 | WBEA |
| Fort McMurray-Patricia McInnes | 1070C   | 56.7514 | -111.4767 | WBEA |
| Fort Chipewyan                 | 1071C   | 58.7092 | -111.1750 | WBEA |
| Millennium Mine                | 1075C   | 56.9693 | -111.4007 | WBEA |
| Fort McKay South               | 1076C   | 57.1492 | -111.6423 | WBEA |
| Anzac                          | 1225C   | 56.4493 | -111.0372 | WBEA |
| CNRL Horizon                   | 1226C   | 57.3037 | -111.7395 | WBEA |
| Shell Muskeg River             | 1244C   | 57.2491 | -111.5087 | WBEA |
| Mildred Lake                   | 1066C   | 57.0500 | -111.5641 | WBEA |
| Mannix                         | 1069C   | 56.9680 | -111.4821 | WBEA |
| Lower Camp                     | 1074C   | 57.0325 | -111.5064 | WBEA |
| AH3                            | 9901P   | 56.6964 | -111.1223 | WBEA |
| AH8                            | 9902P   | 57.1019 | -112.0754 | WBEA |
| BM10                           | 9903P   | 57.3201 | -112.3970 | WBEA |
| BM11                           | 9904P   | 57.6913 | -111.9095 | WBEA |
| BM7                            | 9905P   | 58.0582 | -112.2814 | WBEA |
| JP101                          | 9906P   | 56.5395 | -112.2756 | WBEA |
| JP102                          | 9907P   | 56.9096 | -111.5407 | WBEA |
| JP104                          | 9908P   | 57.1190 | -111.4254 | WBEA |
| JP107                          | 9909P   | 57.8903 | -111.4352 | WBEA |
| JP205                          | 9910P   | 57.8378 | -110.4490 | WBEA |
| JP210                          | 9911P   | 56.2728 | -110.4487 | WBEA |
| JP212                          | 9912P   | 57.0537 | -111.4092 | WBEA |
| JP213                          | 9913P   | 57.0473 | -109.7497 | WBEA |
| NE10                           | 9914P   | 56.6085 | -110.1926 | WBEA |
| NE11                           | 9915P   | 57.2879 | -111.2171 | WBEA |
| NE7                            | 9916P   | 57.1467 | -110.8663 | WBEA |
| SM8                            | 9917P   | 56.2016 | -111.1753 | WBEA |
| WF4                            | 9918P   | 57.1479 | -111.9840 | WBEA |
| Violet Grove                   | 1052C   | 53.1423 | -115.1381 | WCAS |
| Tomahawk                       | 1053C   | 53.3724 | -114.7686 | WCAS |
| Carrot Creek                   | 1054C   | 53.6211 | -115.8692 | WCAS |
| Steeper                        | 1055C   | 53.1324 | -117.0912 | WCAS |
| Genesee                        | 1057C   | 53.3016 | -114.2211 | WCAS |
| Meadows                        | 1058C   | 53.5300 | -114.6361 | WCAS |
| Power                          | 1059C   | 53.6330 | -114.4199 | WCAS |
| Edson                          | 1062C   | 53.5936 | -116.3928 | WCAS |
| Breton                         | 1063C   | 53.0903 | -114.4606 | WCAS |
| Wagner2                        | 1241C   | 53.4294 | -114.3806 | WCAS |

**Table S5 Hourly NO<sub>2</sub> Similarity Ranking for the 1-R and Euclidean Distance (EuD) metrics. Note that stations at the *bottom* of the two columns are the most similar (hence one measure of their level of redundancy) with respect to each metric of dissimilarity. Acronyms are as in Table S1.**

| 1-R  | Name                            | ID   | Aished | EuD (ppbv) | Name                               | ID   | Aished |
|------|---------------------------------|------|--------|------------|------------------------------------|------|--------|
| 0.72 | Maskwa                          | 1248 | LICA   | 1009       | Shell Muskeg River                 | 1244 | WBEA   |
| 0.61 | Anzac                           | 1225 | WBEA   | 950        | Millennium Mine                    | 1075 | WBEA   |
| 0.60 | ST.LINA                         | 1250 | LICA   | 950        | Fort McMurray-Athabasca Valley     | 1064 | WBEA   |
| 0.56 | Steeper                         | 1055 | WCAS   | 923        | Grande Prairie (Henry Pirker)      | 1165 | PAZA   |
| 0.56 | Caroline                        | 1092 | PAMZ   | 839        | Calgary Northwest                  | 1039 | CRAZ   |
| 0.55 | Lethbridge                      | 1049 | AEP    | 839        | Calgary Central 2                  | 1221 | CRAZ   |
| 0.55 | Crescent Heights                | 1172 | PAS    | 807        | Redwater Industrial                | 1156 | FAP    |
| 0.54 | Wagner2                         | 1241 | WCAS   | 769        | Red Deer-Riverside                 | 1142 | PAMZ   |
| 0.54 | Genesee                         | 1057 | WCAS   | 735        | Edson                              | 1062 | WCAS   |
| 0.51 | Shell Muskeg River              | 1244 | WBEA   | 722        | Meadows                            | 1058 | WCAS   |
| 0.51 | CNRL Horizon                    | 1226 | WBEA   | 720        | CNRL Horizon                       | 1226 | WBEA   |
| 0.46 | Fort McMurray-Athabasca Valley  | 1064 | WBEA   | 693        | Edmonton South                     | 1036 | ACCA   |
| 0.46 | Fort McMurray-Patricia McInnes  | 1070 | WBEA   | 638        | Fort McMurray-Patricia McInnes     | 1070 | WBEA   |
| 0.46 | Edson                           | 1062 | WCAS   | 566        | Lethbridge                         | 1049 | AEP    |
| 0.46 | Carrot Creek                    | 1054 | WCAS   | 566        | Crescent Heights                   | 1172 | PAS    |
| 0.46 | Meadows                         | 1058 | WCAS   | 528        | Wagner2                            | 1241 | WCAS   |
| 0.42 | Grande Prairie (Henry Pirker)   | 1165 | PAZA   | 511        | Woodcroft                          | 2002 | ACCA   |
| 0.42 | Beaverlodge                     | 1168 | PAZA   | 511        | Edmonton Central                   | 1028 | ACCA   |
| 0.39 | Millennium Mine                 | 1075 | WBEA   | 439        | Genesee                            | 1057 | WCAS   |
| 0.37 | Redwater Industrial             | 1156 | FAP    | 430        | Beaverlodge                        | 1168 | PAZA   |
| 0.35 | Power                           | 1059 | WCAS   | 428        | Range Road 220                     | 1161 | FAP    |
| 0.32 | Red Deer-Riverside              | 1142 | PAMZ   | 428        | Bruderheim                         | 2000 | FAP    |
| 0.28 | Violet Grove                    | 1052 | WCAS   | 415        | Carrot Creek                       | 1054 | WCAS   |
| 0.28 | Tomahawk                        | 1053 | WCAS   | 411        | Fort McKay South (Syncrude UE1)    | 1076 | WBEA   |
| 0.21 | Bruderheim                      | 2000 | FAP    | 411        | Fort McKay-Bertha Ganter           | 1032 | WBEA   |
| 0.19 | Calgary Northwest               | 1039 | CRAZ   | 403        | Maskwa                             | 1248 | LICA   |
| 0.19 | Calgary Central 2               | 1221 | CRAZ   | 400        | Ross Creek                         | 1159 | FAP    |
| 0.18 | Range Road 220                  | 1161 | FAP    | 400        | Fort Saskatchewan-92 St and 96 Ave | 2001 | FAP    |
| 0.16 | Lamont County                   | 1162 | FAP    | 387        | Anzac                              | 1225 | WBEA   |
| 0.16 | Elk Island                      | 1157 | FAP    | 350        | Violet Grove                       | 1052 | WCAS   |
| 0.16 | Fort McKay South (Syncrude UE1) | 1076 | WBEA   | 350        | Tomahawk                           | 1053 | WCAS   |
| 0.16 | Fort McKay-Bertha Ganter        | 1032 | WBEA   | 348        | Power                              | 1059 | WCAS   |
| 0.15 | Edmonton Central                | 1028 | ACCA   | 301        | Caroline                           | 1092 | PAMZ   |

|      |                                       |      |      |     |               |      |      |
|------|---------------------------------------|------|------|-----|---------------|------|------|
| 0.14 | Woodcroft                             | 2002 | ACCA | 280 | Steeper       | 1055 | WCAS |
| 0.14 | Edmonton South                        | 1036 | ACCA | 280 | ST.LINA       | 1250 | LICA |
| 0.11 | Ross Creek                            | 1159 | FAP  | 263 | Lamont County | 1162 | FAP  |
| 0.11 | Fort Saskatchewan-92 St<br>and 96 Ave | 2001 | FAP  | 263 | Elk Island    | 1157 | FAP  |

5 **Table S6 Hourly SO<sub>2</sub> Similarity Ranking for the 1-R and EuD metrics. Note that stations at the *bottom* of the two columns are the most similar (hence one measure of their level of redundancy) with respect to each metric of dissimilarity. Acronyms are as in Table S1.**

| 1-R  | Name                             | ID   | Aished | EuD<br>(ppbv) | Name                               | ID   | Aished |
|------|----------------------------------|------|--------|---------------|------------------------------------|------|--------|
| 1.01 | Redwater Industrial              | 1156 | FAP    | 1594          | Redwater Industrial                | 1156 | FAP    |
| 0.95 | Caroline                         | 1092 | PAMZ   | 709           | Mannix                             | 1069 | WBEA   |
| 0.88 | Valleyview                       | 1170 | PAZA   | 532           | Mildred Lake                       | 1066 | WBEA   |
| 0.88 | Smoky Heights                    | 1167 | PAZA   | 470           | Millennium Mine                    | 1075 | WBEA   |
| 0.85 | Maskwa                           | 1248 | LICA   | 412           | Shell Muskeg River                 | 1244 | WBEA   |
| 0.85 | Mannix                           | 1069 | WBEA   | 372           | Lower Camp                         | 1074 | WBEA   |
| 0.83 | Red Deer-Riverside               | 1142 | PAMZ   | 269           | CNRL Horizon                       | 1226 | WBEA   |
| 0.81 | Steeper                          | 1055 | WCAS   | 231           | Wagner2                            | 1241 | WCAS   |
| 0.81 | Power                            | 1059 | WCAS   | 231           | Genesee                            | 1057 | WCAS   |
| 0.81 | Meadows                          | 1058 | WCAS   | 220           | Edmonton East                      | 1029 | ACCA   |
| 0.77 | Edmonton East                    | 1029 | CRAZ   | 215           | Maskwa                             | 1248 | LICA   |
| 0.76 | Mildred Lake                     | 1066 | WBEA   | 209           | Ross Creek                         | 1159 | FAP    |
| 0.74 | ST.LINA                          | 1250 | LICA   | 195           | Meadows                            | 1058 | WCAS   |
| 0.74 | Anzac                            | 1225 | WBEA   | 193           | Fort McMurray-Patricia<br>McInnes  | 1070 | WBEA   |
| 0.73 | Woodcroft                        | 2002 | ACCA   | 193           | Fort McMurray-Athabasca<br>Valley  | 1064 | WBEA   |
| 0.71 | Violet Grove                     | 1052 | WCAS   | 192           | ST.LINA                            | 1250 | LICA   |
| 0.70 | Millennium Mine                  | 1075 | WBEA   | 177           | Fort McKay South<br>(Syncrude UE1) | 1076 | WBEA   |
| 0.70 | Lower Camp                       | 1074 | WBEA   | 177           | Fort McKay-Bertha Ganter           | 1032 | WBEA   |
| 0.68 | Beaverlodge                      | 1168 | PAZA   | 167           | Valleyview                         | 1170 | PAZA   |
| 0.67 | Shell Muskeg River               | 1244 | WBEA   | 144           | Anzac                              | 1225 | WBEA   |
| 0.65 | Tomahawk                         | 1053 | WCAS   | 142           | Lamont County                      | 1162 | FAP    |
| 0.65 | Breton                           | 1063 | WCAS   | 142           | Bruderheim                         | 2000 | FAP    |
| 0.62 | Edson                            | 1062 | WCAS   | 138           | Violet Grove                       | 1052 | WCAS   |
| 0.62 | Carrot Creek                     | 1054 | WCAS   | 130           | Tomahawk                           | 1053 | WCAS   |
| 0.61 | Grande Prairie (Henry<br>Pirker) | 1165 | PAZA   | 130           | Breton                             | 1063 | WCAS   |
| 0.61 | Evergreen Park                   | 1166 | PAZA   | 130           | Elk Island                         | 1157 | FAP    |
| 0.59 | Ross Creek                       | 1159 | FAP    | 124           | Power                              | 1059 | WCAS   |
| 0.57 | Lethbridge                       | 1049 | CRAZ   | 118           | Woodcroft                          | 2002 | ACCA   |
| 0.57 | Crescent Heights                 | 1172 | PAS    | 108           | Edson                              | 1062 | WCAS   |
| 0.53 | CNRL Horizon                     | 1226 | WBEA   | 106           | Range Road 220                     | 1161 | FAP    |

|      |                                       |      |      |     |                                       |      |      |
|------|---------------------------------------|------|------|-----|---------------------------------------|------|------|
| 0.53 | Elk Island                            | 1157 | FAP  | 106 | Fort Saskatchewan-92 St and<br>96 Ave | 2001 | FAP  |
|      | Wagner2                               | 1241 | WCAS | 102 | Caroline                              | 1092 | PAMZ |
| 0.48 | Genesee                               | 1057 | WCAS | 91  | Smoky Heights                         | 1167 | PAZA |
| 0.45 | Range Road 220                        | 1161 | FAP  | 79  | Carrot Creek                          | 1054 | WCAS |
| 0.45 | Fort Saskatchewan-92 St<br>and 96 Ave | 2001 | FAP  | 70  | Lethbridge                            | 1049 | CRAZ |
| 0.39 | Lamont County                         | 1162 | FAP  | 58  | Beaverlodge                           | 1168 | PAZA |
| 0.39 | Bruderheim                            | 2000 | FAP  | 55  | Grande Prairie (Henry<br>Pirker)      | 1165 | PAZA |
| 0.35 | Fort McMurray-Patricia<br>McInnes     | 1070 | WBEA | 50  | Crescent Heights                      | 1172 | PAS  |
| 0.35 | Fort McMurray-Athabasca<br>Valley     | 1064 | WBEA | 42  | Evergreen Park                        | 1166 | PAZA |
| 0.19 | Fort McKay South<br>(Syncrude UE1)    | 1076 | WBEA | 24  | Steeper                               | 1055 | WCAS |
| 0.19 | Fort McKay-Bertha Ganter              | 1032 | WBEA | 24  | Red Deer-Riverside                    | 1142 | PAMZ |

hourly observations for Alberta sites: NO<sub>2</sub> ( colour-code: airshed )

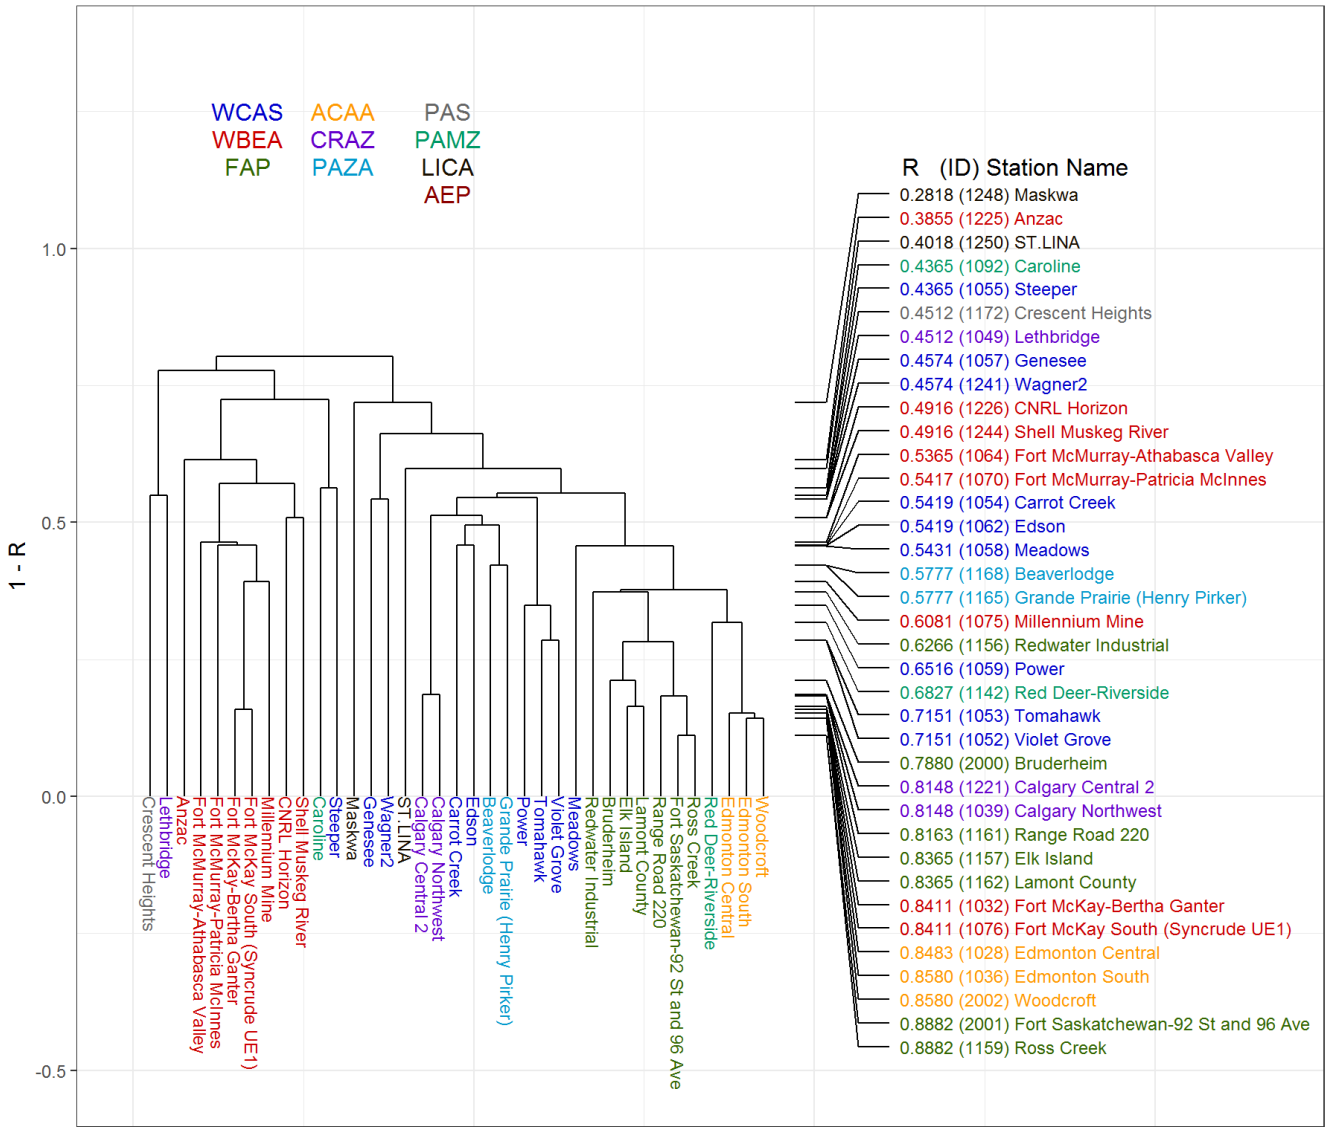

Figure S1: Dendrogram analysis for continuous hourly NO<sub>2</sub> averages using 1-R as the metric to compute the dissimilarity matrix. Airshed acronyms: West Central Airshed Society (WCAS), Wood Buffalo Environmental Association (WBEA), Fort Air Partnership (FAP), Alberta Capital Airshed Alliance (ACAA), Calgary Regional Airshed Zone (CRAZ), Peace Airshed Zone Association (PAZA), Palliser Airshed Society (PAS), Parkland Airshed Management Zone (PAMZ) and Lakeland Industrial Community Association (LICA). The dendrogram is colour-coded according to Airshed. Right side: stations ranked from low (top) to high (bottom) correlation level.

5

daily & shorter periods filter observations for Alberta sites: NO<sub>2</sub> ( colour-code: airshed )

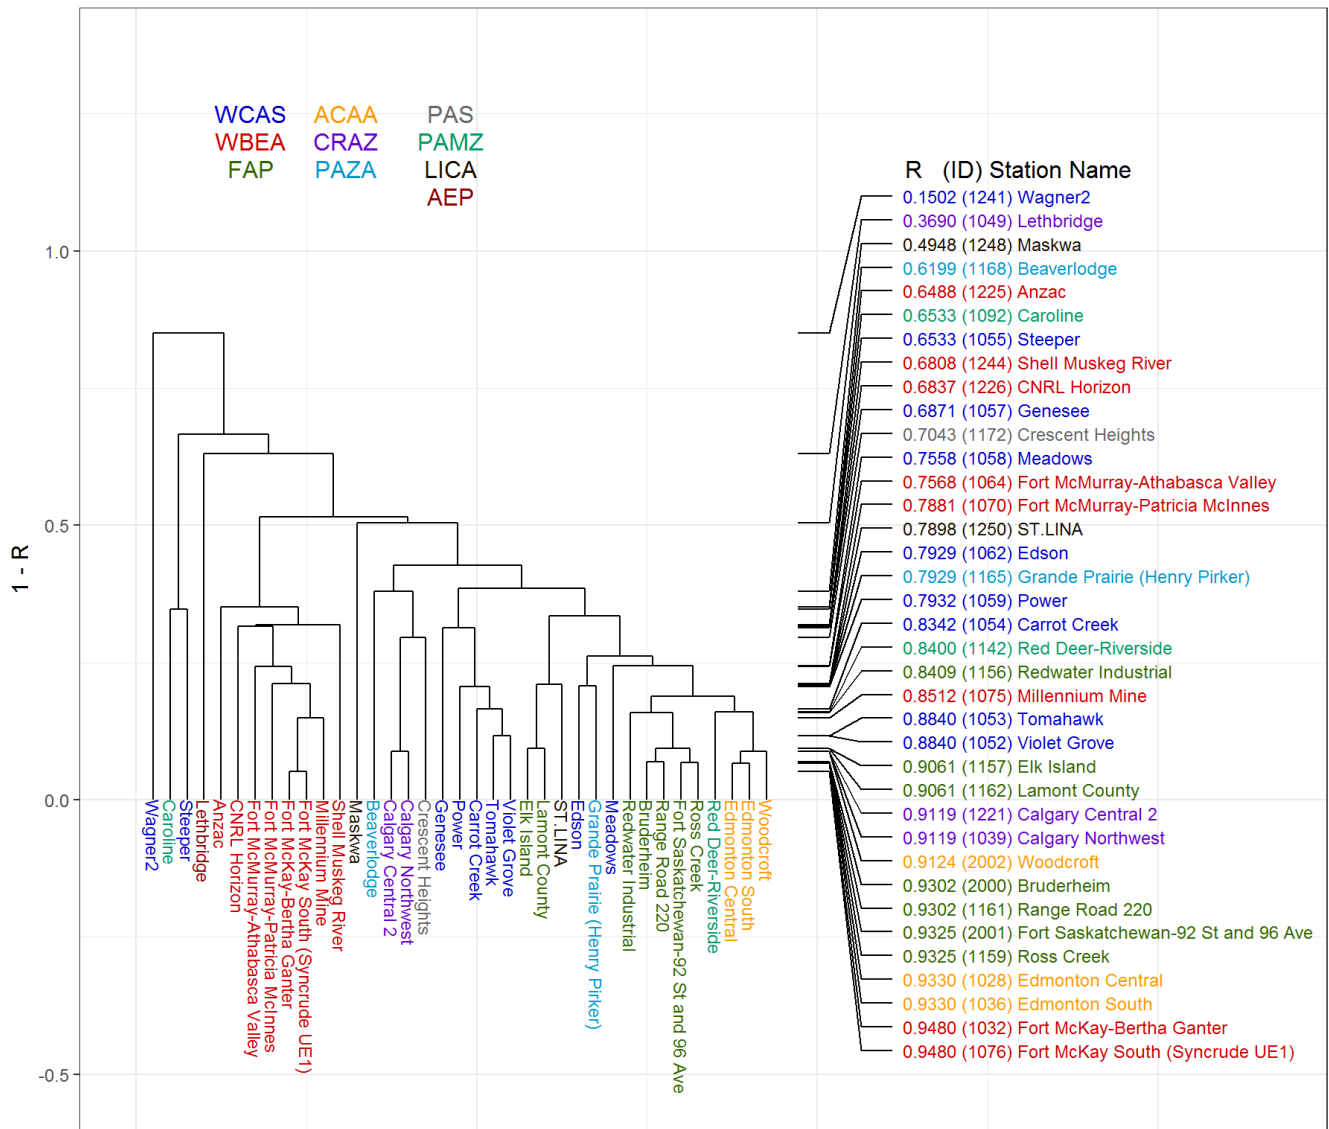

Figure S2: Dendrogram analysis for NO<sub>2</sub> daily or shorter time scales time series using 1-R as the metric to compute the dissimilarity matrix, for the Airsheds described in Figure S1. The dendrogram is colour-coded according to Airshed. Right side: stations ranked from low to high correlation level.

weekly & shorter periods filter observations for Alberta sites: NO<sub>2</sub> ( colour-code: airshed )

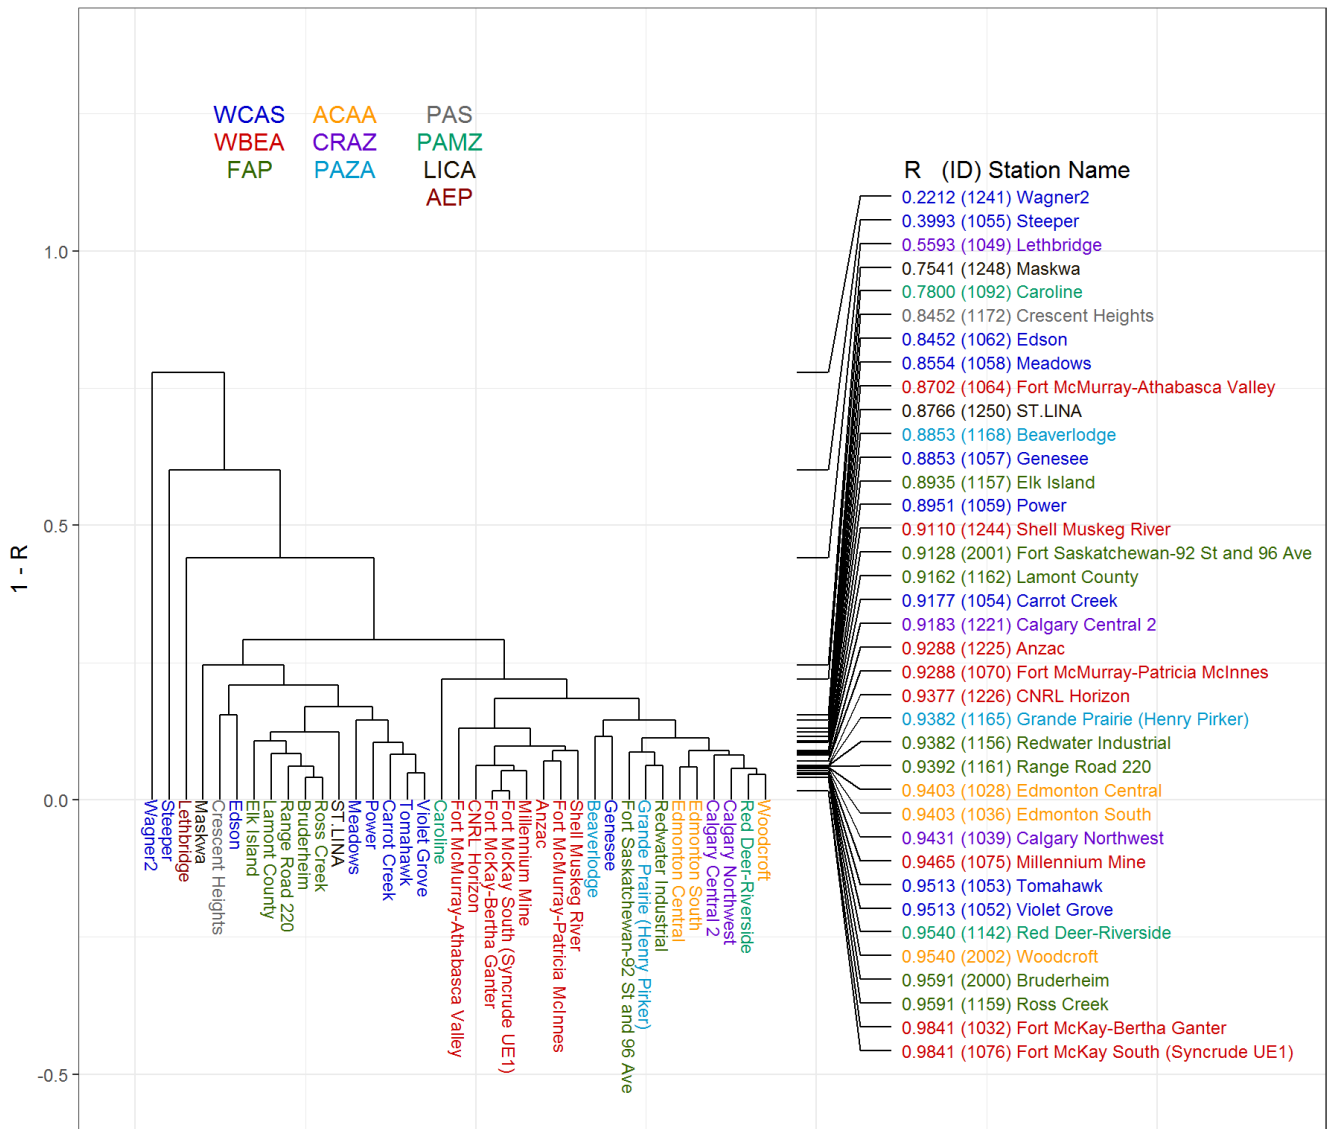

Figure S3: Dendrogram analysis for NO<sub>2</sub> weekly or shorter time scales time series using 1-R as the metric to compute the dissimilarity matrix, for the Airsheds described in Figure S1. The dendrogram is colour-coded according to Airshed. Right side: stations ranked from low to high correlation level.

monthly & shorter periods filter observations for Alberta sites: NO<sub>2</sub> ( colour-code: airshed )

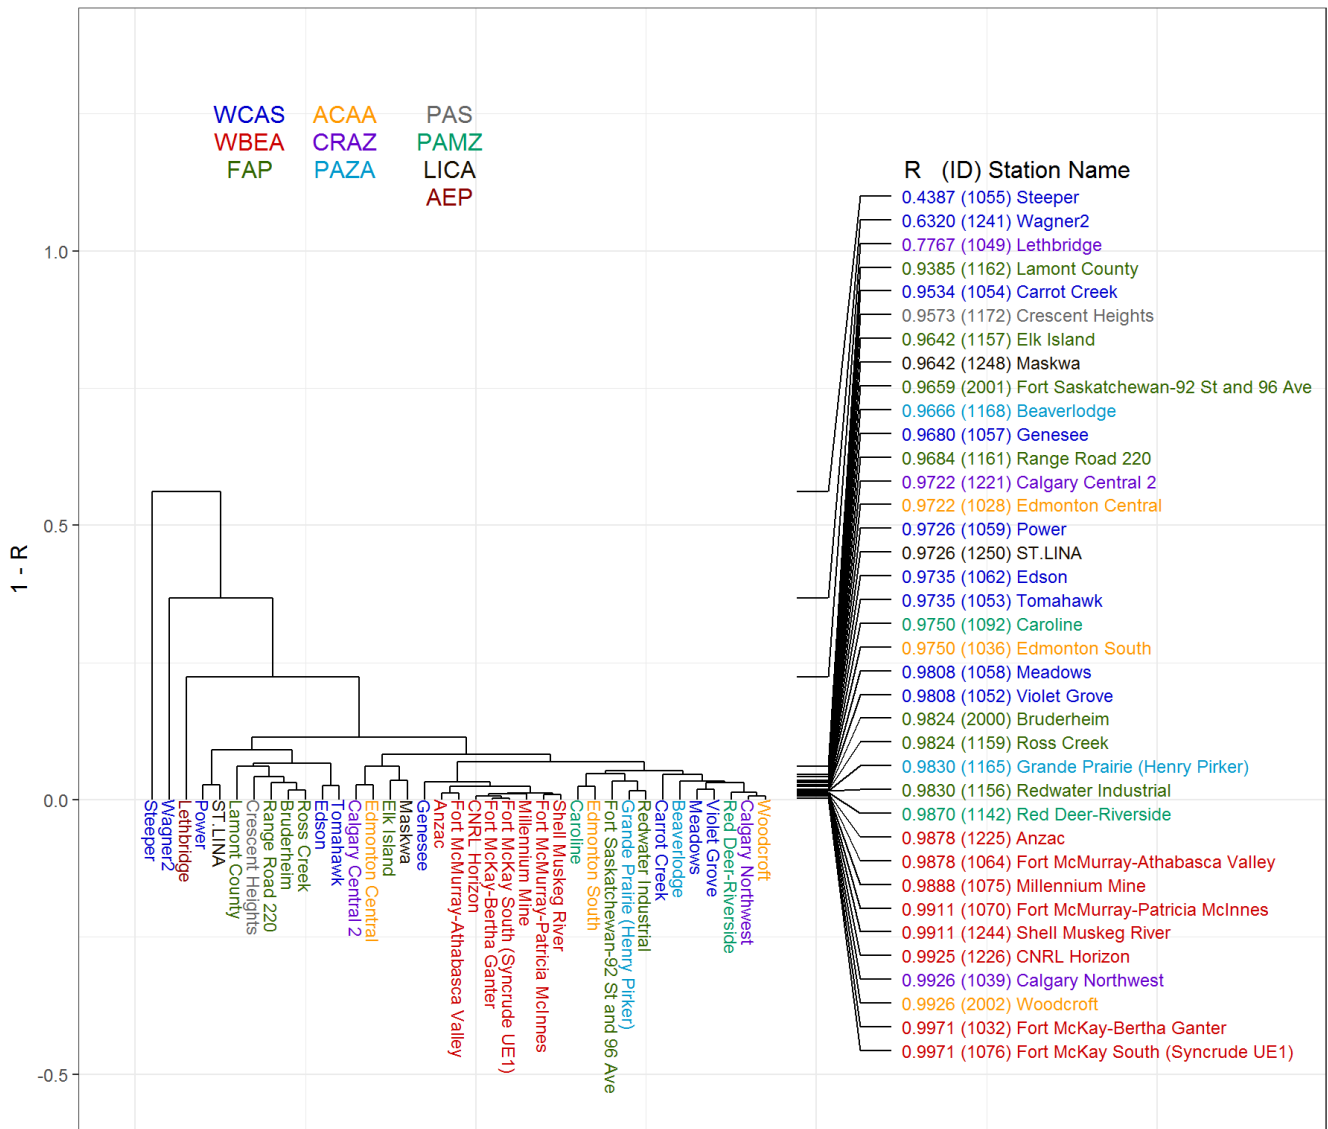

Figure S4: Dendrogram analysis for NO<sub>2</sub> monthly or shorter time scales time series using 1-R as the metric to compute the dissimilarity matrix, for the Airsheds described in Figure S1. The dendrogram is colour-coded according to Airshed. Right side: stations ranked from low to high correlation level.



hourly observations for Alberta sites: SO2 ( colour-code: airshed )

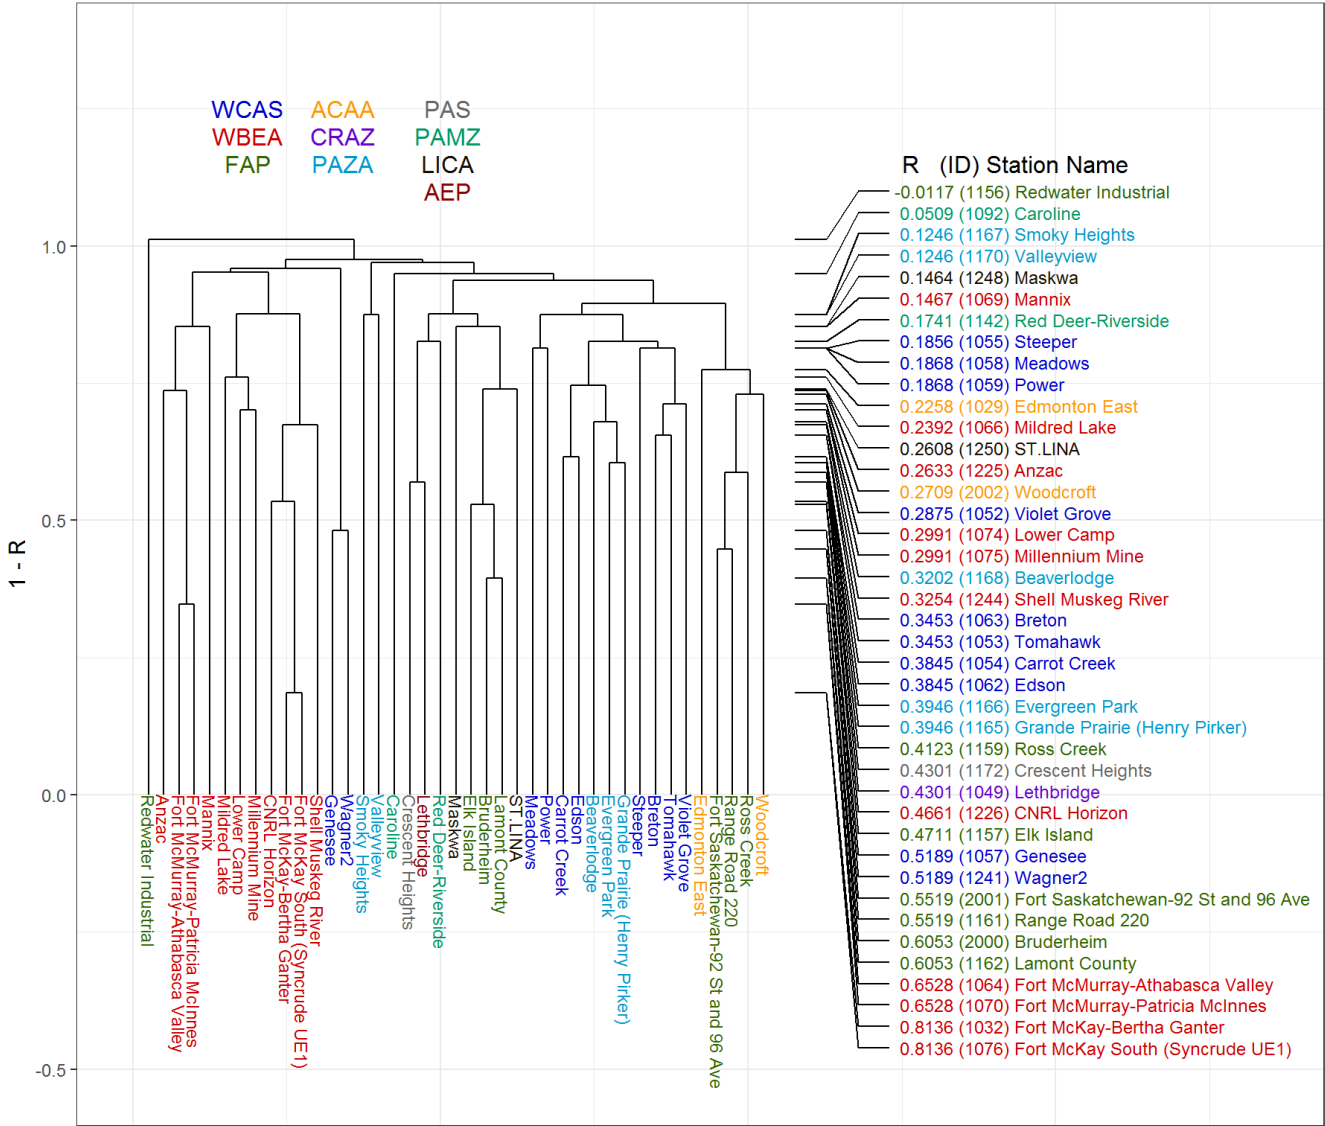

Figure S5: Dendrogram analysis for continuous hourly SO<sub>2</sub> averages using 1-R as the metric to compute the dissimilarity matrix, for the Airsheds described in Figure S1. The dendrogram is colour-coded according to Airshed. Right side: stations ranked from low to high correlation level.

daily & shorter periods filter observations for Alberta sites: SO<sub>2</sub> ( colour-code: airshed )

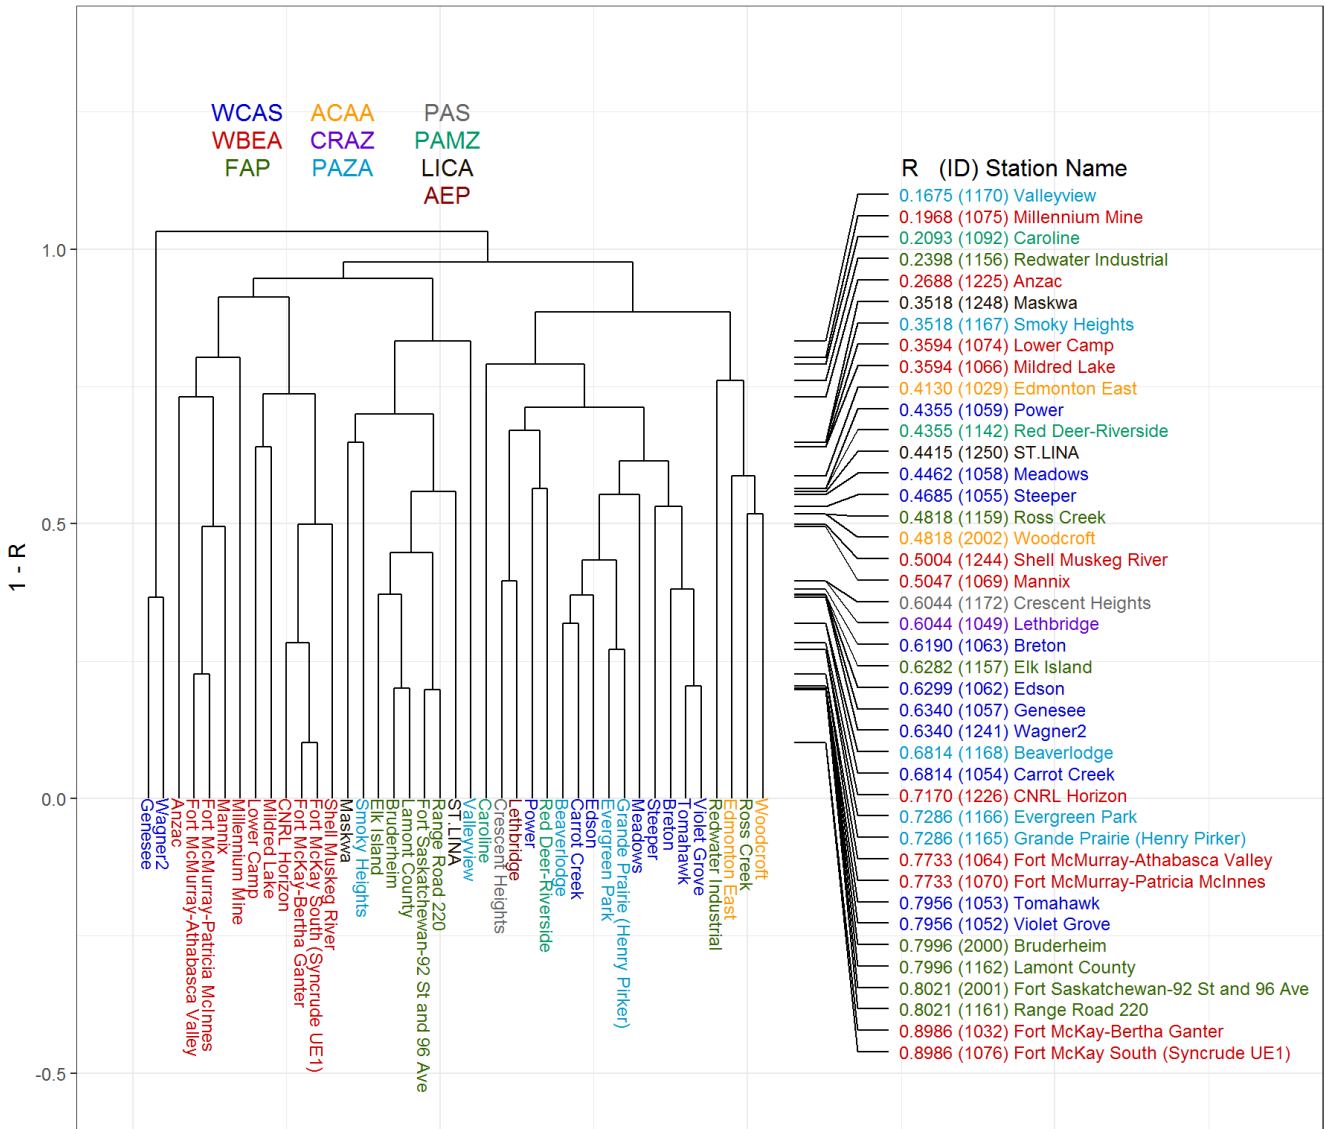

Figure S6: Dendrogram analysis for SO<sub>2</sub> daily or shorter time scales time series using 1-R as the metric to compute the dissimilarity matrix, for the Airsheds described in Figure S1. The dendrogram is colour-coded according to Airshed. Right side: stations ranked from low to high correlation level.

weekly & shorter periods filter observations for Alberta sites: SO<sub>2</sub> ( colour-code: airshed )

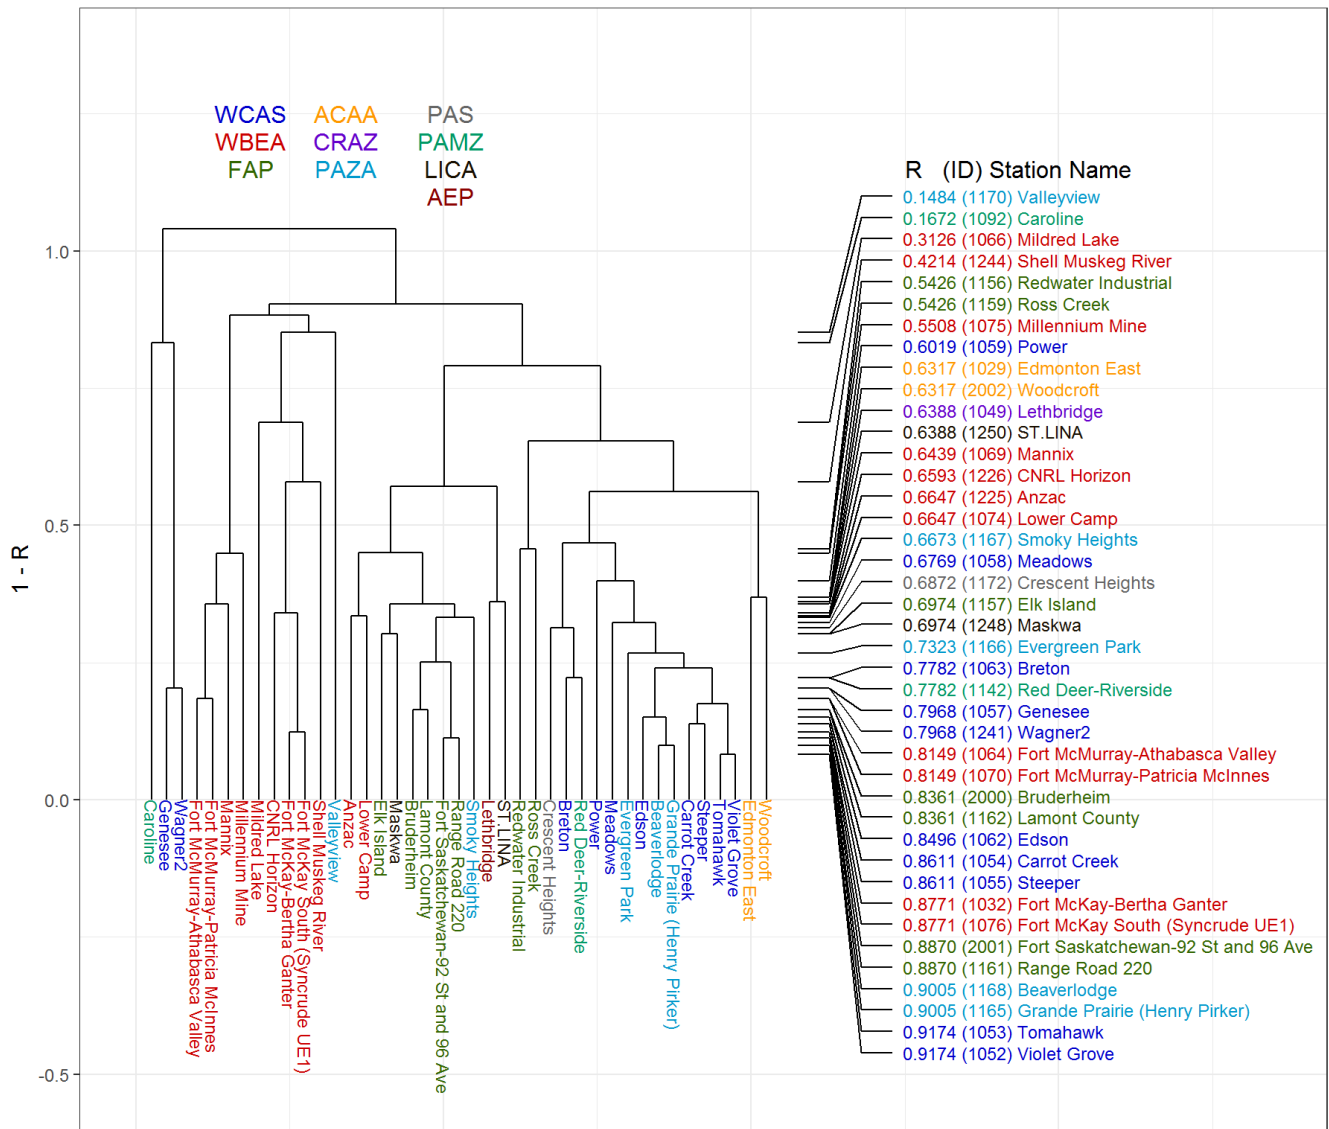

Figure S7: Dendrogram analysis for SO<sub>2</sub> weekly or shorter time scales time series using 1-R as the metric to compute the dissimilarity matrix, for the Airsheds described in Figure S1. The dendrogram is colour-coded according to Airshed. Right side: stations ranked from low to high correlation level.

monthly & shorter periods filter observations for Alberta sites: SO<sub>2</sub> ( colour-code: airshed )

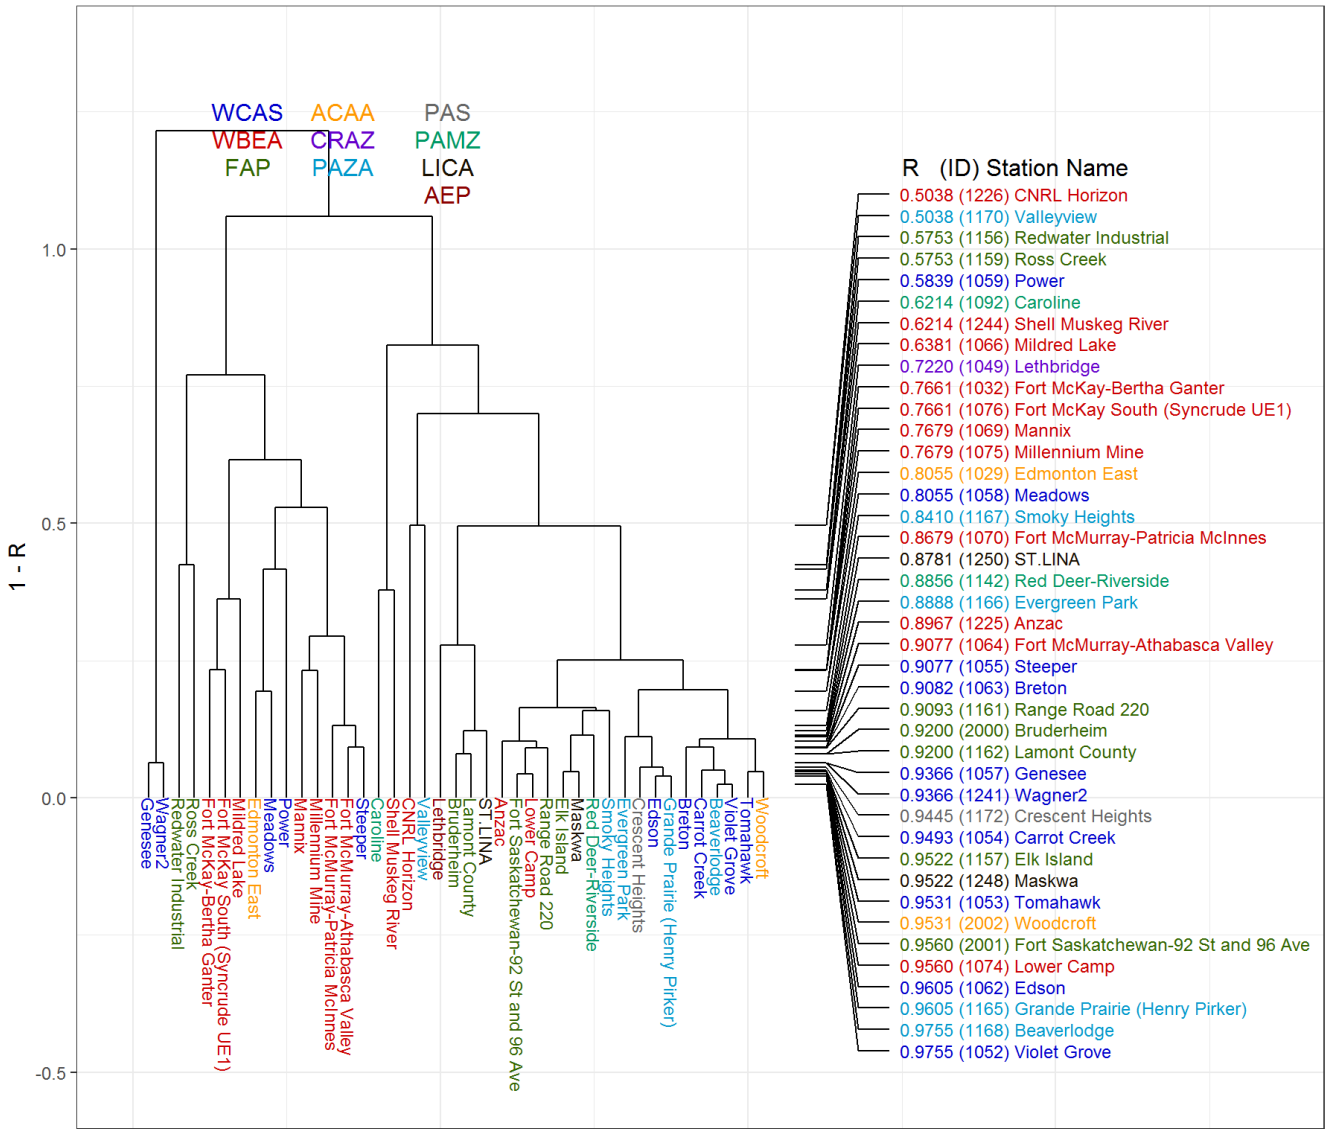

Figure S8: Dendrogram analysis for SO<sub>2</sub> monthly or shorter time scales time series using 1-R as the metric to compute the dissimilarity matrix, for the Airsheds described in Figure S1. The dendrogram is colour-coded according to Airshed. Right side: stations ranked from low to high correlation level.

hourly observation for Alberta sites: NO<sub>2</sub> ( colour-code: airshed )

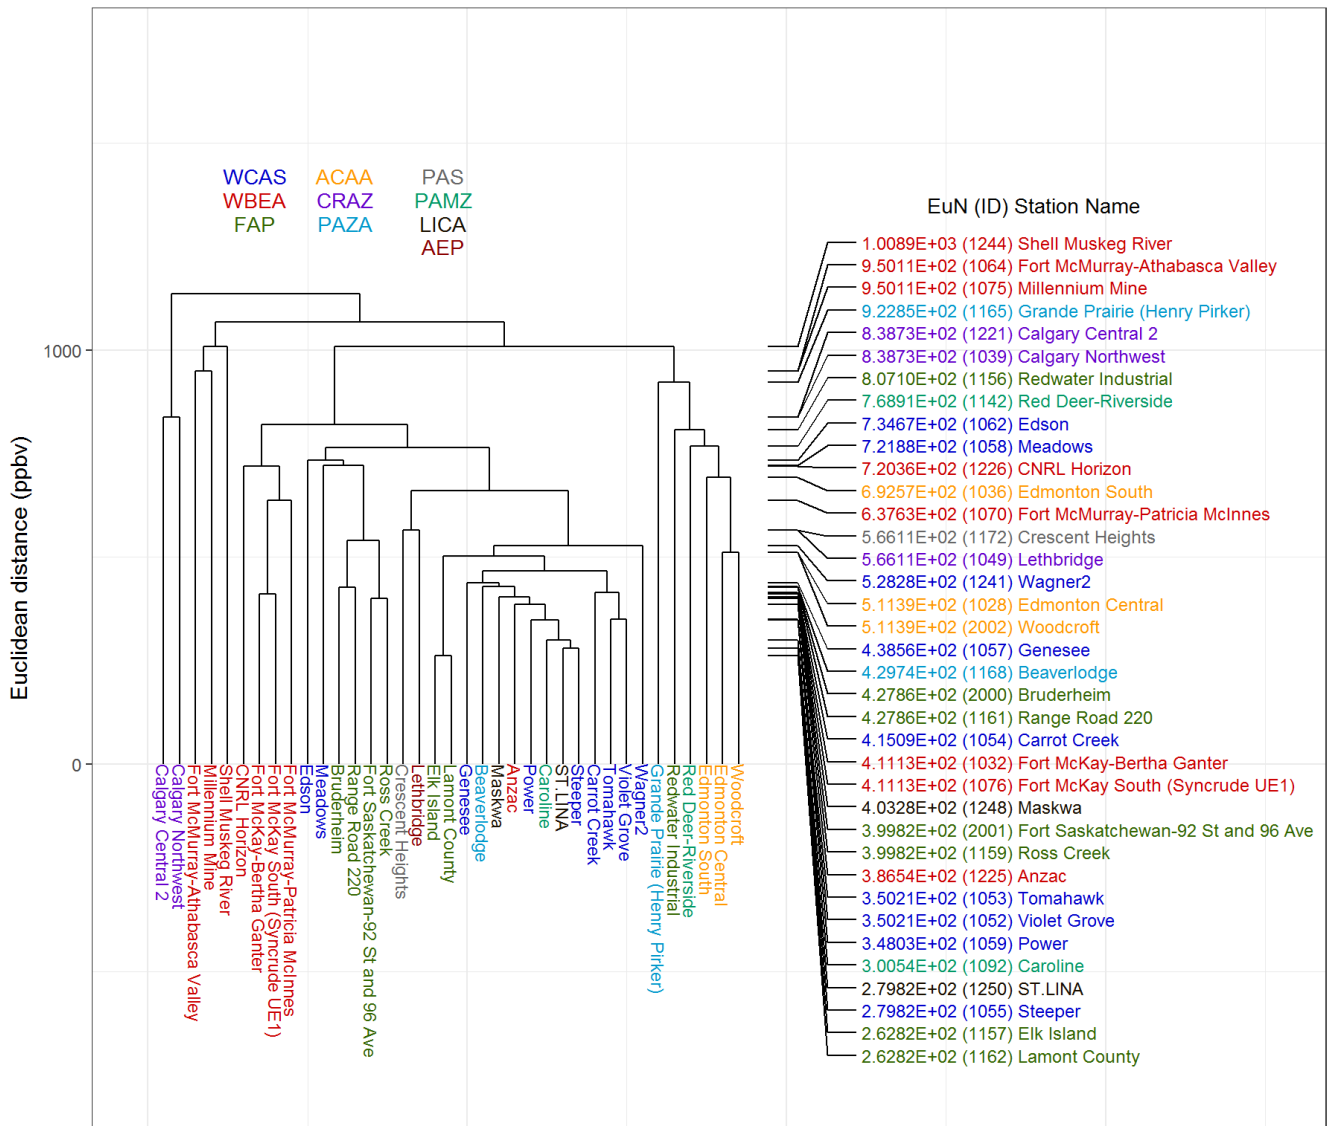

**Figure S9: Dendrogram analysis for continuous hourly NO<sub>2</sub> averages using Euclidean distance as the metric to compute the dissimilarity matrix, for the Airsheds described in Figure S1. The dendrogram is colour-coded according to Airshed. Right side: stations ranked from high to low Euclidean distance level.**

hourly observation for Alberta sites: SO<sub>2</sub> ( colour-code: airshed )

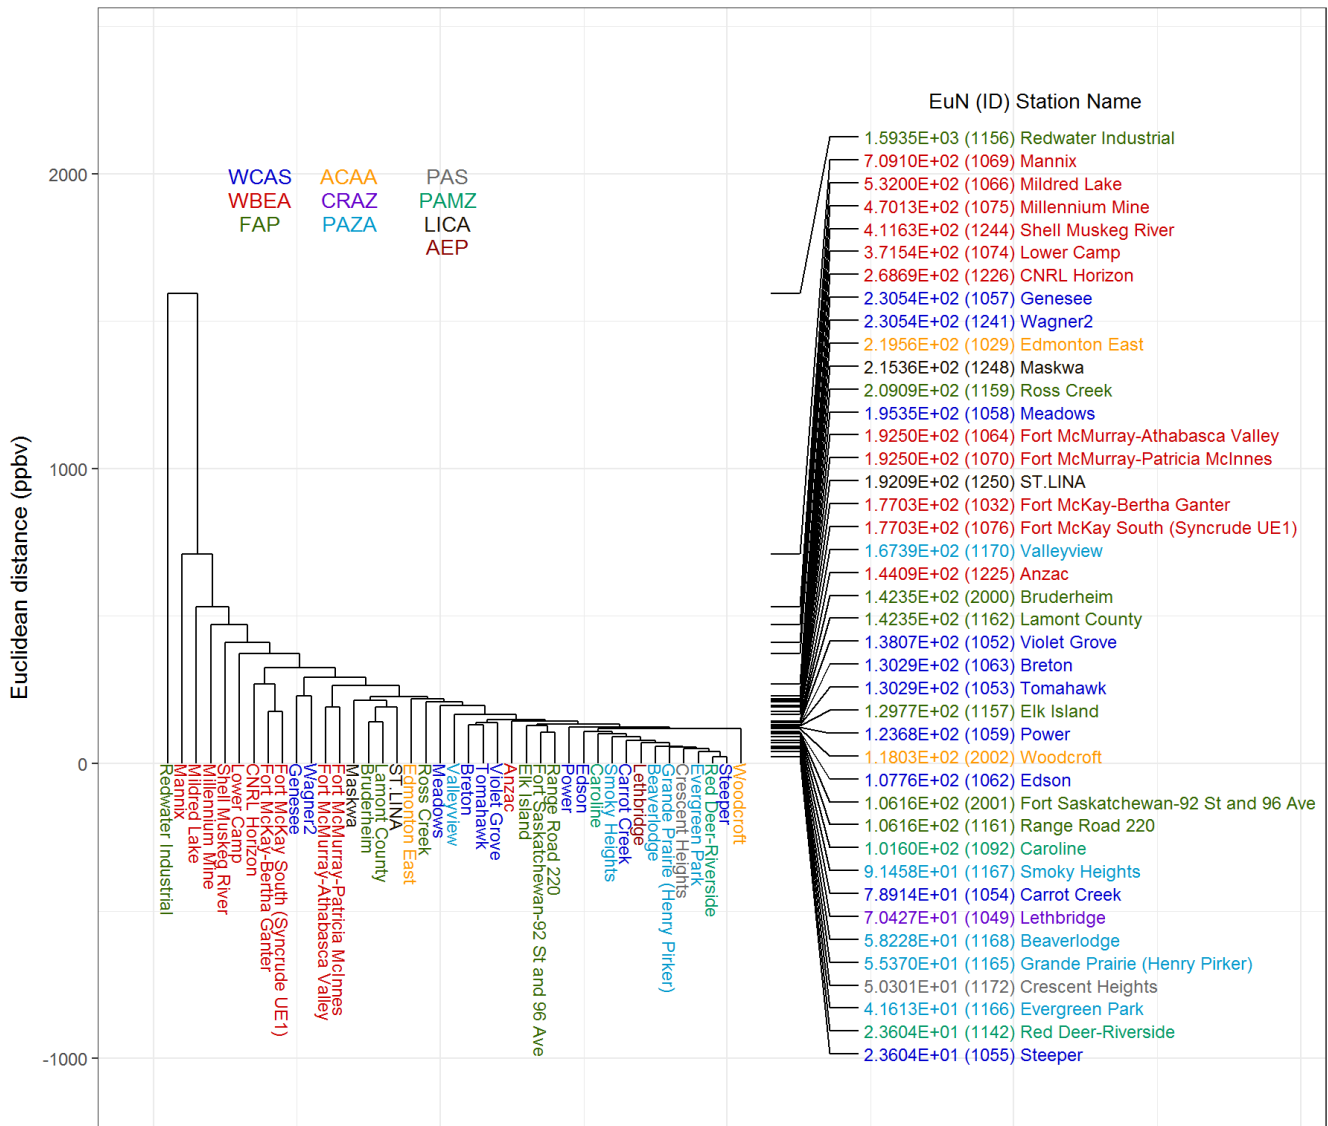

Figure S10: Dendrogram analysis for continuous hourly SO<sub>2</sub> averages using Euclidean distance as the metric to compute the dissimilarity matrix, for the Airsheds described in Figure S1. The dendrogram is colour-coded according to Airshed. Right side: stations ranked from high to low Euclidean distance level.

NO2 bimonthly averages for Alberta sites (colour-code: airshed)

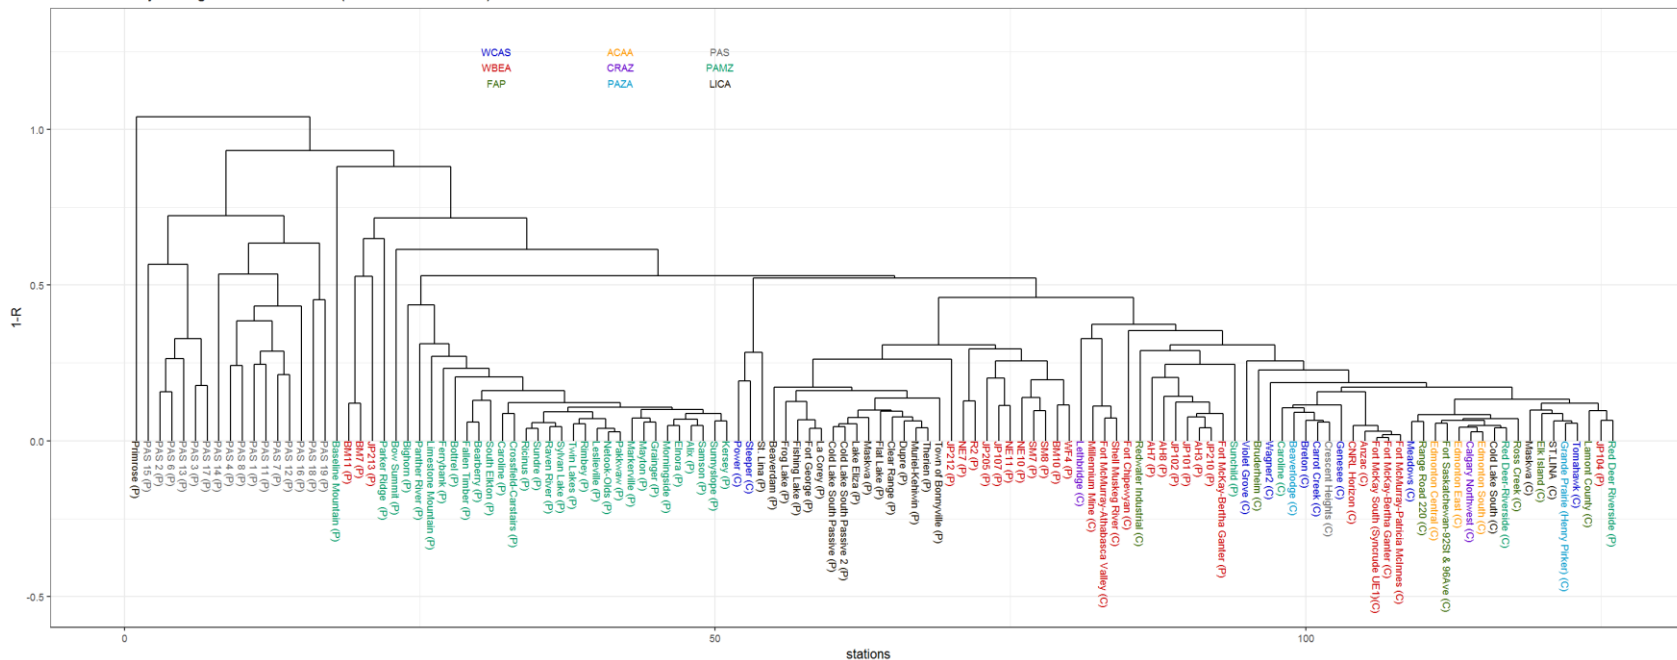

**Figure S11 Dendrogram analysis for passive and continuous bimonthly NO<sub>2</sub> averages using 1-R as the metric to compute the dissimilarity matrix, for the Airsheds described in Figure S1. Stations are colour-coded according to Airshed. Station names which are continuous end in a “(C)”, and stations which are passive end in a “(P)”.**

SO2 bimonthly averages for Alberta sites (colour-code: airshed)

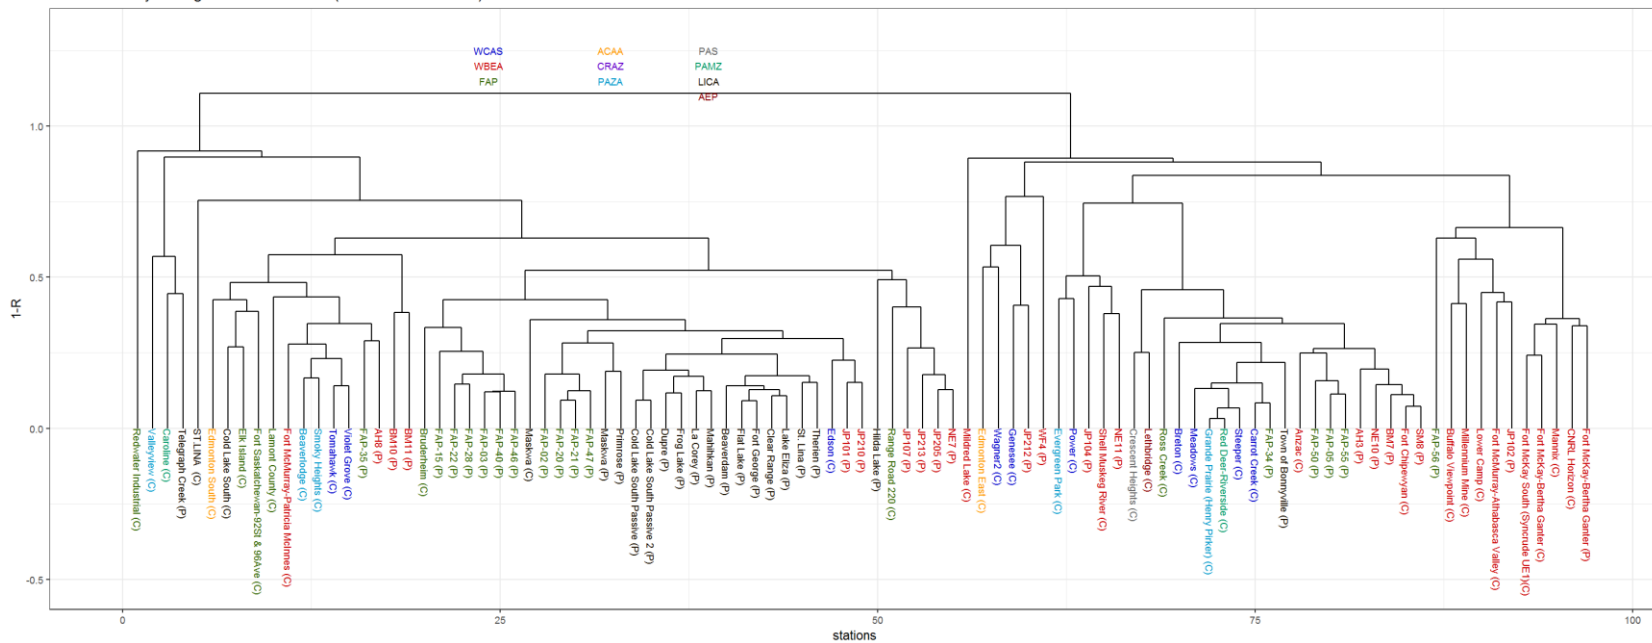

Figure S12 Dendrogram analysis for passive and continuous bimonthly SO<sub>2</sub> averages using 1-R as the metric to compute the dissimilarity matrix, for the Airsheds described in Figure S1. Stations are colour-coded according to Airshed. Station names which are continuous end in a “(C)”, and stations which are passive end in a “(P)”.



NO2 bimonthly averages for WBEA sites (colour-code: airshed )

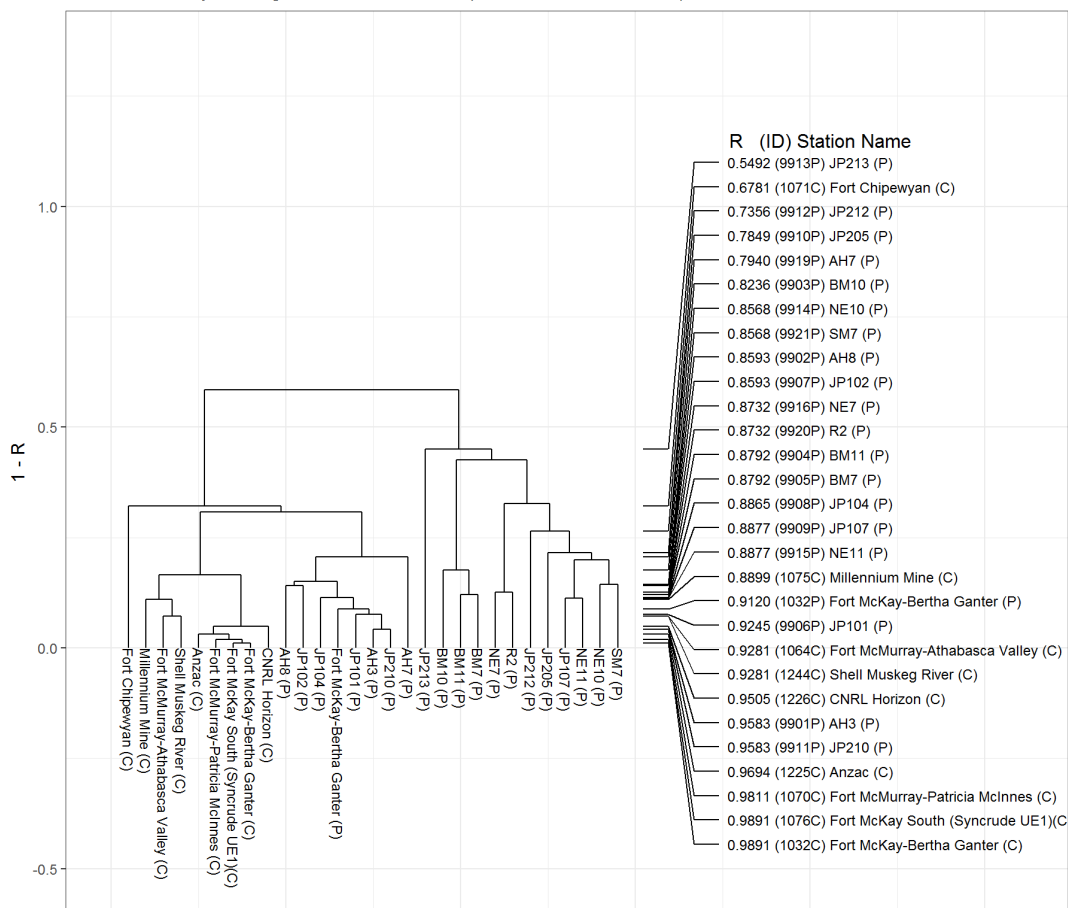

5 **Figure S13 Dendrogram analysis for passive and continuous bimonthly NO<sub>2</sub> averages using 1-R as the metric to compute the dissimilarity matrix, for the Wood Buffalo Environmental Association (WBEA). Station names which are continuous end in a “(C)”, and stations which are passive end in a “(P)”. Right side:stations ranked from low to high correlation level.**

hourly model data for Alberta sites:  
NO<sub>2</sub> ( colour-code: airshed )

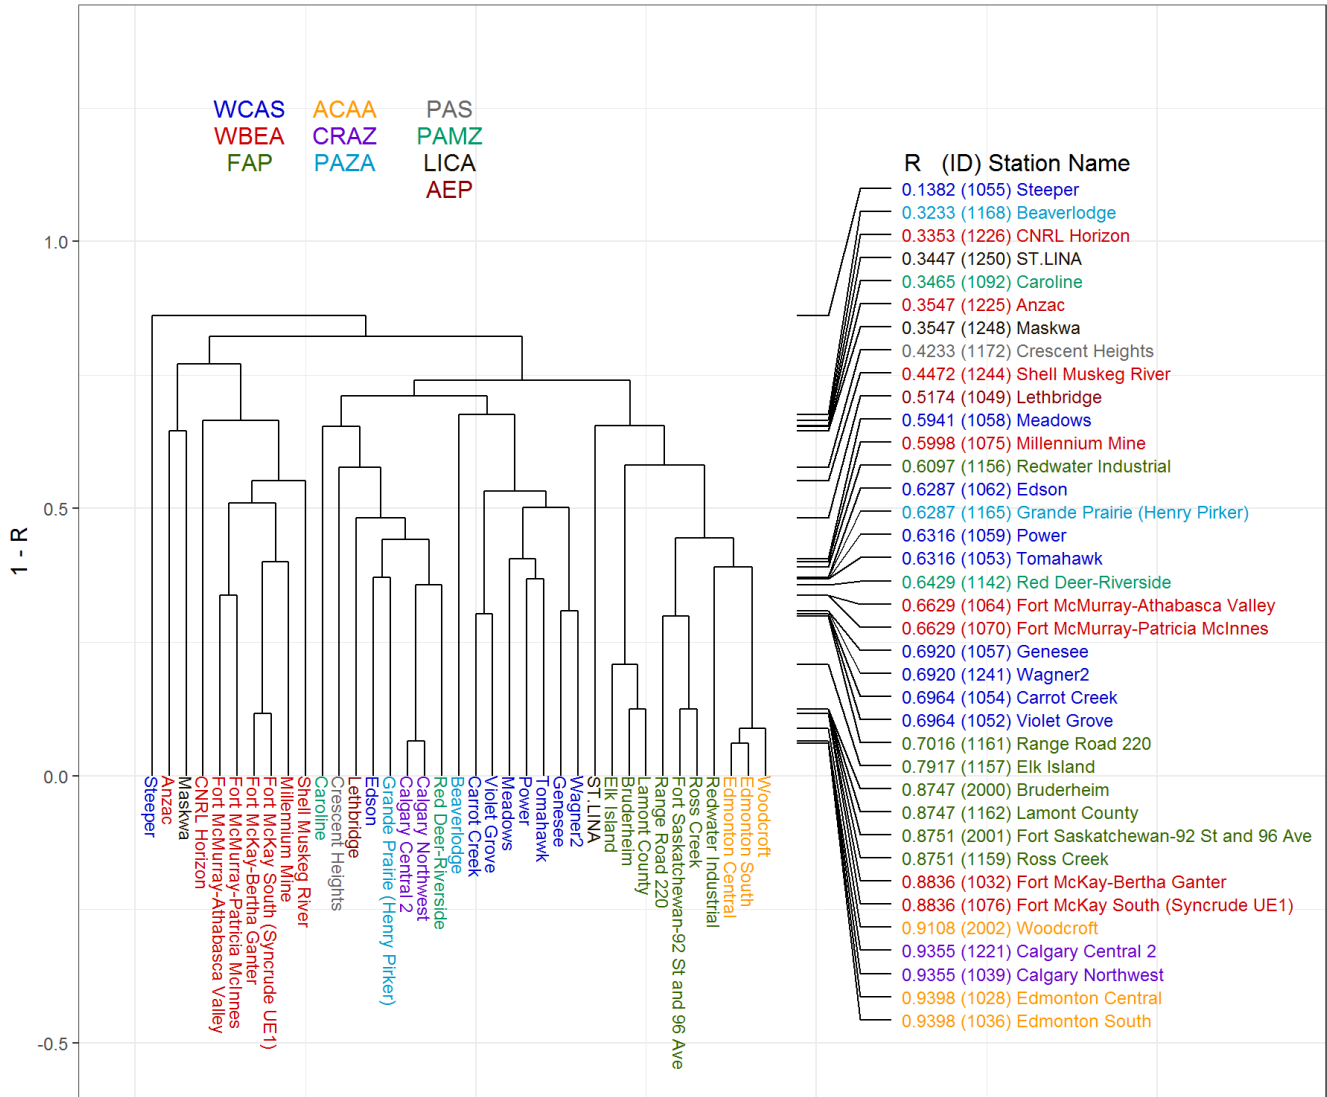

Figure S14: Dendrogram analysis for modelled hourly NO<sub>2</sub> averages using 1-R as the metric to compute the dissimilarity matrix, for the Airsheds described in Figure S1.

hourly model data for Alberta sites:  
SO<sub>2</sub> ( colour-code: airshed )

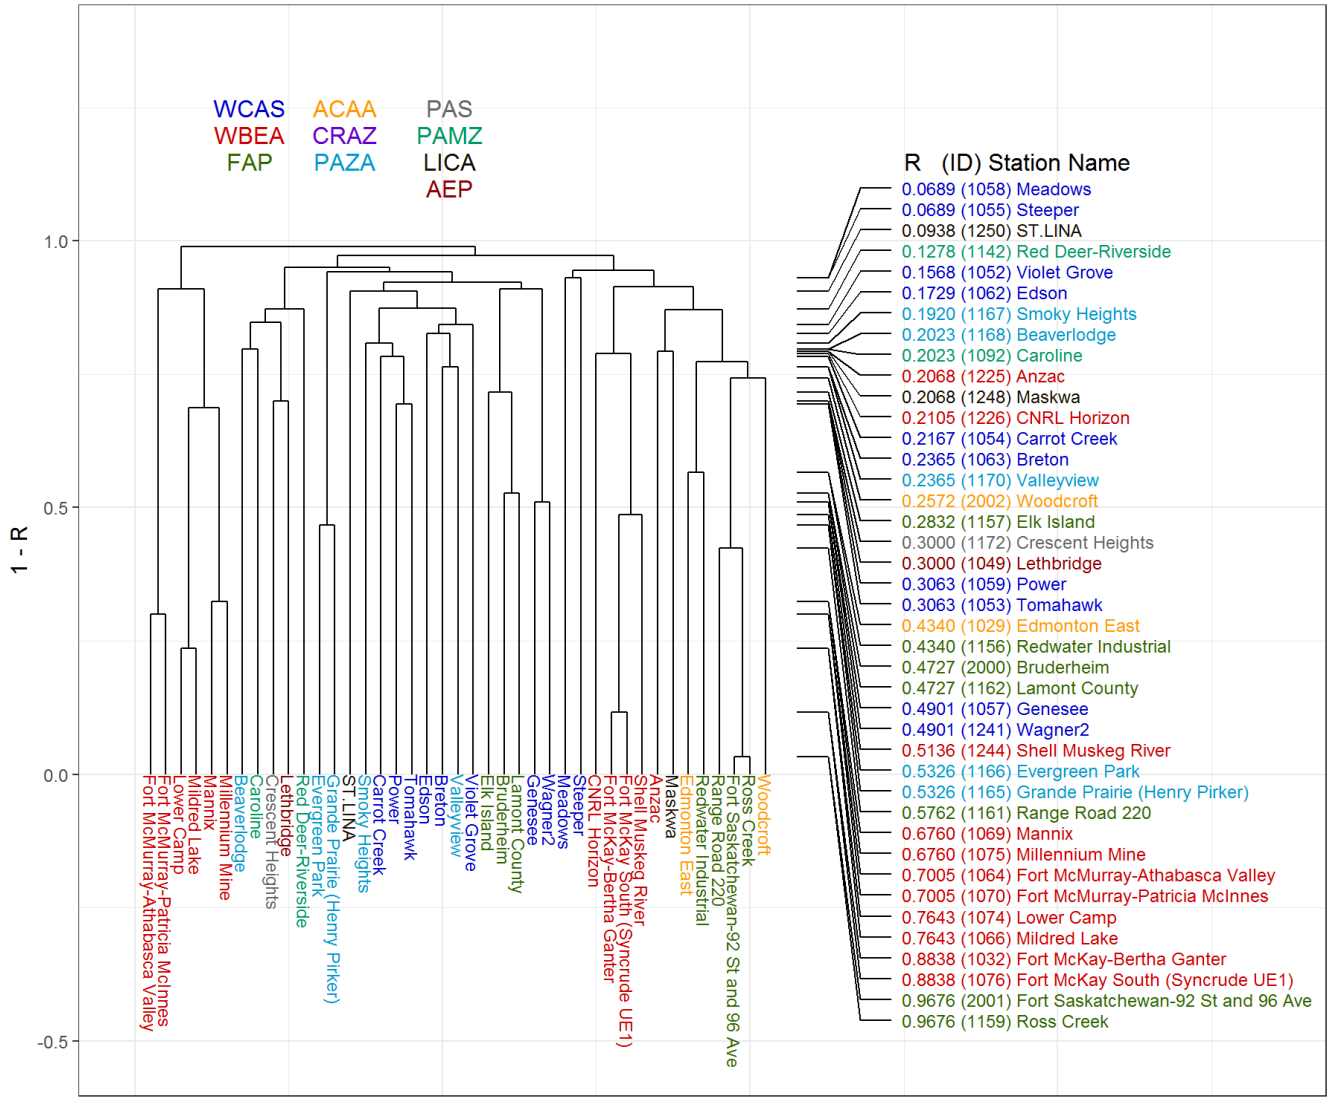

Figure S15: Dendrogram analysis for modelled hourly SO<sub>2</sub> averages using 1-R as the metric to compute the dissimilarity matrix, for the Airsheds described in Figure S1.

# Supplement 2

## The KZ Filter, Low-Pass versus Band Pass Filtering

The KZ-filter is defined as an iteration of a moving average filter applied on a time-series  $S(t_i)$  (Zurbenko, 1986):

5

$$KZ_{m,p} = R_{i=1}^p \left\{ J_{k=1}^{W_i} \left[ \frac{1}{m} \sum_{j=\frac{m-1}{2}}^{\frac{m-1}{2}} S(t_i)_{k,j} \right] \right\} \{ W_i = L_i - m + 1 \} \quad (A1)$$

Where  $R$  is the iteration,  $m$  is the window size,  $p$  is the number of iterations,  $J$  is the running window,  $S(t_i)$  the time series, and  $L_i$  is the length of the time series  $S(t_i)$ . Equation (A1) may be interpreted as  $p$  successive applications of a moving average of length  $m$  to the time series  $S$ , with the updated  $S$  being used as the starting time series for the subsequent moving average. The initial time series must thus have additional entries before and after the period  $L$  of interest, in order to result in a filtered time series of length  $L$  following the last application of the moving average. The first moving average is computed with a running window  $J$  and becomes the input for the second pass, and so on. The KZ filter controlling parameters  $m$  and  $p$  allow different time scales to be removed and filtered, as is described below.

15 The KZ belongs to the class of low-pass filters (since it filters periods smaller than a selected cut-off represented by a specific pair of  $m$  and  $p$ . The filter removes high frequency variations from the data (with respect to the window size) and belongs to the class of low-pass filters (since it filters periods smaller than the selected cut-off period). The KZ filter's original intent was a low-frequency pass filter but has been used as a band-pass in several air quality applications (e.g. Kang *et al* (2013), Galmarini *et al* (2013), Hogrefe *et al* (2000), Rao *et al*, (1997)), through taking the differences of time series  
20 pre-filtered for different time scales. However, the application of the difference in KZ filters for band-pass purposes does not separate the spectral components completely, with the energy spectrum overlapping on between the neighbour components (Hogrefe *et al.*, 2000, 2003). The band-pass applications of the KZ filter suggested by Solazzo and Galamarini (2015) were tested by the authors of the current report. Artificial time series were constructed to examine the band-pass application's ability to separate known time-scales in those time series; the results were mixed, with intermediate time scales known to be  
25 in the input data failing to be resolved in subsequent clustering analysis. The band-pass approach's inability to completely separate adjacent time scales is the likely cause of this problem; too much energy leakage occurred, reducing correlations in clustering, and adding "noise" to the analysis.

However, the KZ filter in its original low-pass form was found to be able to separate the time scales in the test data accurately, with clustering showing the influence of the different time scales, given an appropriate choice of the filtering  
30 parameters  $m$  and  $p$ . That is, the analysis used here removes all of the energy below each of the time scales of interest (or, equivalently, above specific frequency thresholds), rather than attempting a band-pass approach. In addition to the hourly

QA/QC and gap-filled data, the KZ filter was thus used to remove the energy for periods less than 1 day ( $KZ_{17,3}$ ), less than 7 days ( $KZ_{95,5}$ ) and less than 30 days is removed ( $KZ_{523,3}$ ).

The choice of the values of  $m$  and  $p$  for these filters follows from the energy characteristics of the filter system. These can be derived from the transfer function of the KZ filter (see Eskridge *et al.* (1997) and Zurbenko, (1986) for details on the transfer function), given by

$$|\phi_{m,p}(\omega)|^2 = \left[ \frac{1}{m} \frac{\sin(\pi m \omega)}{\sin(\pi \omega)} \right]^{2p} \quad (\text{A2})$$

where  $\omega$  has units of cycles per hour (frequency), for hourly observation data. The transfer function defines the energy passed or removed by the filter as a function of frequency. Figure A1 shows the lines defining the low-pass filters for  $(m,p) = (17,3)$ ,  $(95,5)$ , and  $(523,3)$  used in the current analysis. The frequencies to the left of the lines are “passed” by the filter for the given value of  $(m,p)$ , those to the right are removed.

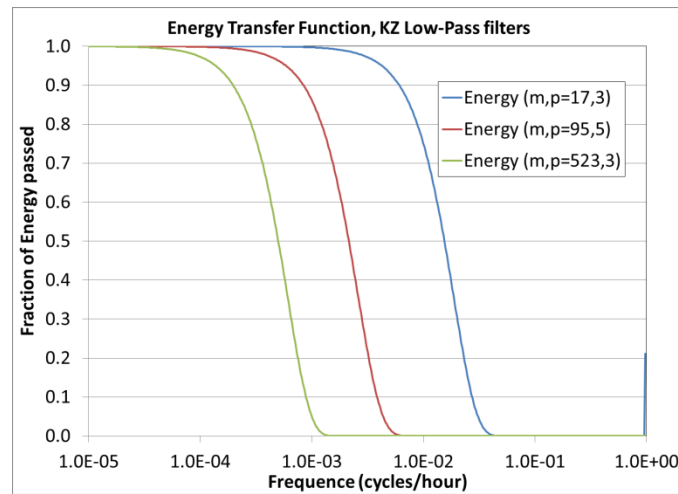

**Figure A1** Energy transfer functions for  $KZ_{17,3}$ ,  $KZ_{95,5}$ ,  $KZ_{523,3}$

It can be seen from inspection of Figure A1 that the lines forming the boundaries between frequencies which are passed and those which are removed are not step-functions, but have a gradual change – for example, the  $(523,3)$  KZ filter passes 99.75% of the energy for frequencies less than  $3.0 \times 10^{-5}$  cycles/hour (period greater than 3.75 years), 50% of the energy at  $5.01 \times 10^{-4}$  cycles per hour (periods of 83.2 days) and less than 0.25% of the energy at frequencies greater than  $1.36 \times 10^{-3}$  cycles/hour (periods less than 31.1 days). The filter characteristics of the three low-pass filters used here are given in Table A1 below.

20

**Table A1** Frequency and period pass characteristics of the three KZ filters used here.

| M   | P | Frequency                | Period     | Frequency                | Period    | Frequency                | Period    |
|-----|---|--------------------------|------------|--------------------------|-----------|--------------------------|-----------|
|     |   | 99.75 %                  | 99.75 %    | 50 %                     | 50 %      | 0.25 %                   | 0.25 %    |
| 17  | 3 | $9.38332 \times 10^{-4}$ | 44.4 days  | $1.54338 \times 10^{-2}$ | 2.70 days | $4.12341 \times 10^{-2}$ | 1.01 days |
| 95  | 5 | $1.26846 \times 10^{-4}$ | 328 days   | $2.14594 \times 10^{-3}$ | 19.4 days | $6.06578 \times 10^{-3}$ | 6.97 days |
| 523 | 3 | $3.04471 \times 10^{-5}$ | 3.75 years | $5.00840 \times 10^{-4}$ | 83.2 days | $1.35751 \times 10^{-3}$ | 31.1 days |

Table A1 shows that the three different (m,p) pairs selected for our work remove 99.75% of the energy for periods less than 1 day (17,3), 7 days (95,5), and 31 days (523,3), respectively. In subsequent figures and drawings, time series subjected to these filters will be referred to as having removed periods less than 1 day, less than 1 week, and less than one month. It should also be noted that despite the gradual slope of each band-pass filter, the near-complete removal of energy for periods less than those in the final column of Table A1 is a well-defined quantity. One can say with good confidence then that the resulting filtered time series will have less than 0.25% of the energy remaining for periods less than the limits shown in the table. One caveat on that is the 17,3 “daily” filter, which shows some energy leakage at periods specifically of the original time series (one cycle per hour); this daily filter will contain about 20% of the energy of periods equal to the original hourly time series interval.

The gradual slope, rather than a square-wave cut-off, for the KZ *low-pass* filter, highlights a potential difficulty with the use of the past use of that filter for *band-pass* purposes (e.g. Hogrefe *et al*, 2000, Solazzo and Galmarini, 2015). The use of the KZ filter as a band-pass filter involves two steps. In the first step, the KZ filter is applied on the original data for two different sets of (m,p) pairs, resulting in two different filtered time series. In the second step, the difference between these time series at each time point is constructed (lower order pair filtered time series – higher order pair filtered time series, at each time step). The KZ filters used in these past applications are shown in Figure A2:  $KZ_{3,3}$ ,  $KZ_{13,5}$ ,  $KZ_{103,5}$ , and  $KZ_{310,7}$ . The time series resulting from the difference between the original time series and  $KZ_{3,3}$  is referred to as “intra-day” (periods less than 12 hours), whereas “diurnal” (periods between 12 hours and 2.5 days), “synoptic” (periods between 2 days and 21 days) and “long-term” (periods between 21 and 90 days) time series are formed from the differences  $KZ_{3,3}-KZ_{13,5}$ ,  $KZ_{13,5}-KZ_{103,5}$ , and  $KZ_{103,5}-KZ_{310,7}$ , respectively.  $KZ_{310,7}$  is said to form the “seasonal” (periods over 90 days) component of the time series.

The energy transfer functions for these “standard” filters are applied two ways in Figure A2. Figure A2 (a) shows the low-pass filters for the regions bounded by  $KZ_{3,3}$ ,  $KZ_{13,5}$ ,  $KZ_{103,5}$ , and  $KZ_{310,7}$ . The energy response of the filters has a similar shape to those in Figure A1, though the energy response of the  $KZ_{3,3}$  filter can be seen to have a more significant

contribution near frequencies of 1 cycle per hour, suggesting a significant “leakage” of energy from short time scales with this filter. The regions used in previous work to describe different filter bands are labelled as noted above. While it can be seen by inspection of Figure A2 (a) that the energy associated with the difference between any two KZ filters will vary depending on frequency, the implications of that variation are more clearly displayed in Figure A2(b), in which the differences between low-pass filters are used to define the band-pass filters used in previous work. Figure A2 (b) shows significant overlap in filtered energy between the “diurnal” (green), “synoptic” (purple), “long term” (light blue), and “seasonal” (red) filters. For example, the seasonal and synoptic filters both pass 47% of the energy at a frequency of  $5.75 \times 10^{-4}$  cycles/hour (72 days), and the seasonal and synoptic filters both pass 49% of the energy at  $2.0 \times 10^{-3}$  cycles/hour (21 days); the diurnal and synoptic filters both pass 49% of the energy at  $1.58 \times 10^{-2}$  cycles/hour (2.6 days) and the diurnal and intraday filters share the same boundary for frequencies greater than  $4.17 \times 10^{-2}$  (1 day), including the region near frequencies of 1 cycle/hour. Some energy leakage occurs between the diurnal and synoptic filters as well, at the less than 0.05 level. The filters are not the ideal “square wave” associated with a band pass, but are subject to considerable overlap.

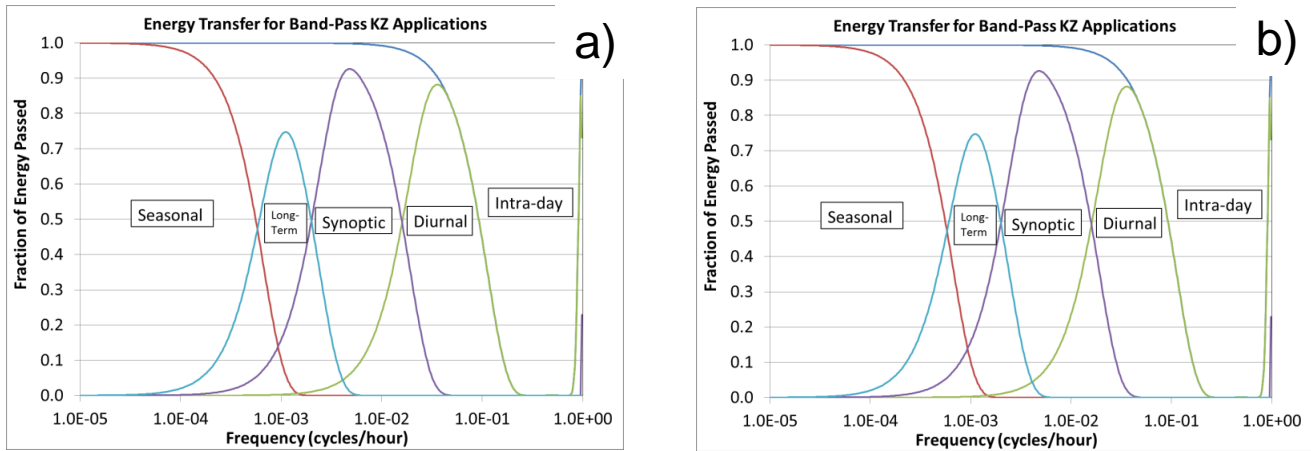

**Figure A2** Energy transfer for previous applications of KZ filtering as a “band-pass” filter. (a) Transfer functions for low-pass filters. (b) Transfer functions for band-pass difference filters, as well as intra-day band-pass and seasonal low-pass filters

This degree of overlap has significant implications for the “bandpass” use of the KZ filter in the manner described in previous work (Eskridge *et al*, 1997, Hogrefe *et al*, 2000, Solazzo and Galmarini, 2015). The time labels for these filters are based on the 50% energy transfer levels of the differences to define a range in time represented by the filters. Figure A2(b) shows that these boundaries are not unique in energy – that is, a significant fraction of “seasonal” energy will be present in the “long-term” signal, a significant fraction of the “long-term” energy will be present in the “seasonal” signal, and so on. In order to determine the potential impact of the overlap in band-pass on hierarchical clustering (described in more detail below), three time series were constructed for testing both low-pass and band-pass filtering combined with correlation

analysis. The three time series are intended to represent hypothetical observations from three observation sites (A,B,C), and the time signals going into their construction are shown in Figure A3, with the formulae describing the components of each time series and the net time series shown in Table A2.



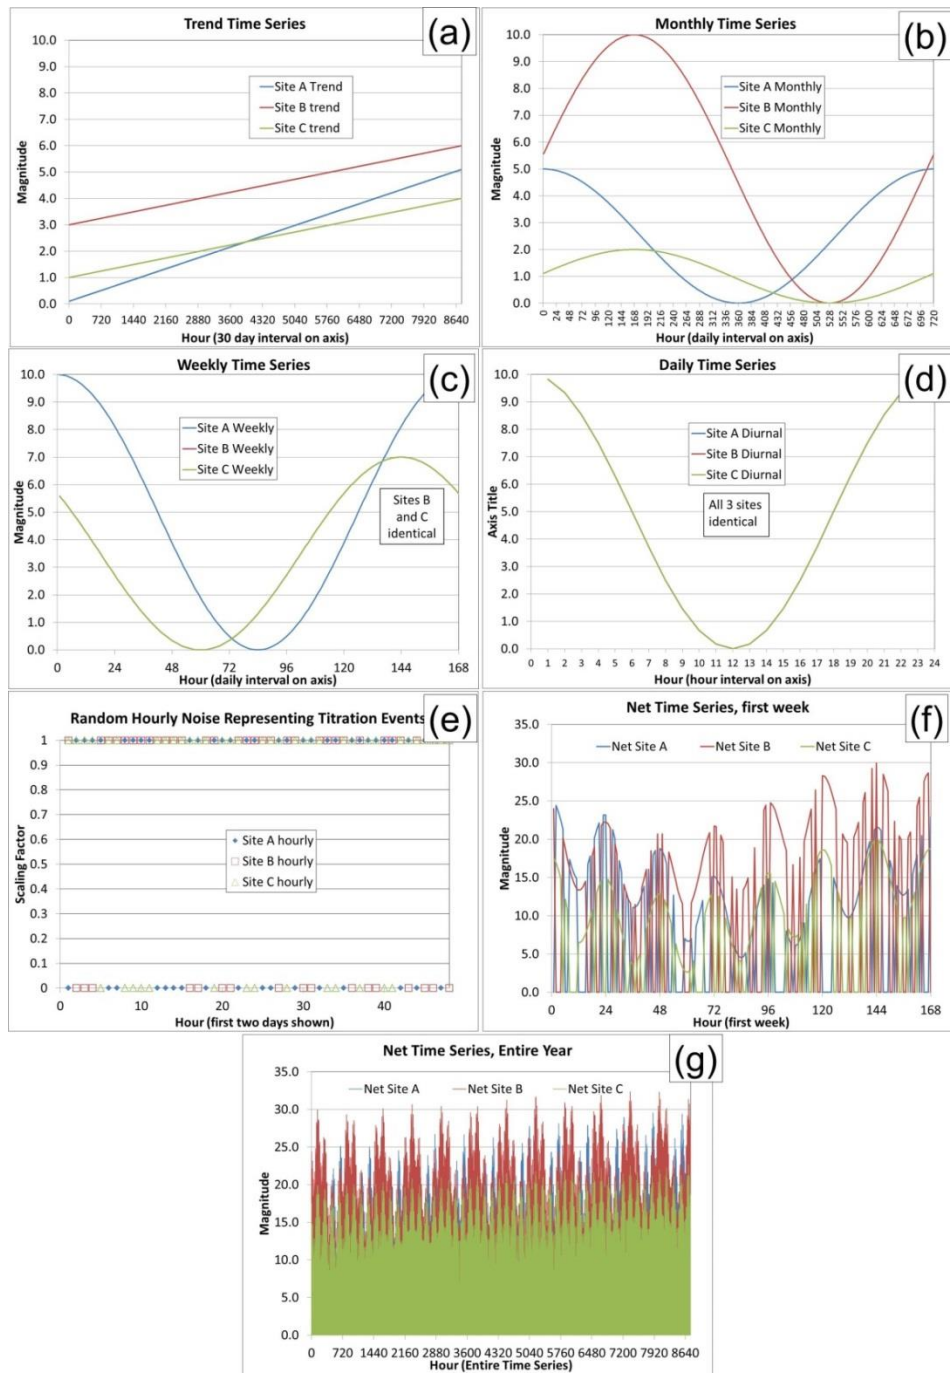

**Figure A3** Construction of the test time series for three hypothetical stations. (a) Annual trend. (b) Monthly variation. (c) Weekly variation. (d) Diurnal variation. (e) Random noise (0 or 1) used to represent plume titration. (f) Resulting net signal. (g) Net signal for an entire year of hourly values.

**Table A2** Components of Time Series for Testing

| Site     | Time Component Formula (h=hour of year) |                                                                  |                                                                  |                                                          |
|----------|-----------------------------------------|------------------------------------------------------------------|------------------------------------------------------------------|----------------------------------------------------------|
|          | Trend                                   | Monthly                                                          | Weekly                                                           | Daily                                                    |
| <b>A</b> | $h\left(\frac{5}{8760}\right) + 0.1$    | $2.5 \left[ \cos\left(\frac{\pi h}{360}\right) + 1 \right]$      | $5 \left[ \cos\left(\frac{\pi h}{84}\right) + 1 \right]$         | $5 \left[ \cos\left(\frac{\pi h}{12}\right) + 1 \right]$ |
| <b>B</b> | $h\left(\frac{3}{8760}\right) + 3$      | $5 \left[ \cos\left(\frac{\pi(h - 168)}{360}\right) + 1 \right]$ | $3.5 \left[ \cos\left(\frac{\pi(h + 24)}{84}\right) + 1 \right]$ | $5 \left[ \cos\left(\frac{\pi h}{12}\right) + 1 \right]$ |
| <b>C</b> | $h\left(\frac{3}{8760}\right) + 1$      | $\left[ \cos\left(\frac{\pi(h - 168)}{360}\right) + 1 \right]$   | $3.5 \left[ \cos\left(\frac{\pi(h + 24)}{84}\right) + 1 \right]$ | $5 \left[ \cos\left(\frac{\pi h}{12}\right) + 1 \right]$ |

In order to create the time series used for testing and displayed in Figure A3 (f,g), the four components for each site described in Table A2 were added. The resulting time series were then multiplied by random numbers whereby at any given hour, two of the three time series values were multiplied by unity, with the remaining site value by zero, the choice of which time series to locally zero being chosen at random. This addition of random zeroing was added to mimic plumes which may reach only one station at a time (e.g. the summed time series representing ozone, and the zeroing representing a plume of NOx titrating ozone at one station and not the others). Table A2 and Figure A3 show that all three stations are identical in terms of their diurnal variation, stations B and C are identical for the weekly variation, stations B and C have the same monthly variation and a magnitude offset, and the stations all have different long-term trends. Having constructed this test dataset of three stations, it may be used for different KZ filtering approaches in order to determine whether those approaches may discern the timescales known to exist within the constructed time series.

The aim of the dissimilarity analysis (described in more detail in the following section) is to compare station time series based on a metric such as 1-R, where R is the Pearson correlation coefficient, in order to group stations based on the lowest level of dissimilarity (or highest correlation). For a simple set of only 3 stations such as has been constructed here for testing, the correlation between their time series need only be calculated three times for the three unique pairs of the stations ((A,B), (B,C) and (A,C)). The different methodologies for KZ filtering are first applied to the time series, and then correlations are calculated for the three resulting pairs of filtered time series; these may be used to determine whether the methodology used recovers information about the time scale used. Table A3 shows this analysis using the 1-R metric, for the band-pass filters, starting from the time series constructed from Table A2 and Figure A3.

**Table A3** 1-R values between pairs of test time series, for original time series and KZ band-pass filters.

| Original Hourly Time Series                                            |          |          | Interpretation |                                                                                                                                                                                                                                                                                                                                                                                                                                                                                                                                                                                                                                                                                                                                                                                                                      |
|------------------------------------------------------------------------|----------|----------|----------------|----------------------------------------------------------------------------------------------------------------------------------------------------------------------------------------------------------------------------------------------------------------------------------------------------------------------------------------------------------------------------------------------------------------------------------------------------------------------------------------------------------------------------------------------------------------------------------------------------------------------------------------------------------------------------------------------------------------------------------------------------------------------------------------------------------------------|
|                                                                        | <b>A</b> | <b>B</b> | <b>C</b>       | The dissimilarity (1-R) is greater than unity for all pairs – the addition of the random zeroing has created sufficient noise that the original time series are anticorrelated.                                                                                                                                                                                                                                                                                                                                                                                                                                                                                                                                                                                                                                      |
| <b>A</b>                                                               | 0.0000   | 1.298    | 1.260          |                                                                                                                                                                                                                                                                                                                                                                                                                                                                                                                                                                                                                                                                                                                                                                                                                      |
| <b>B</b>                                                               | 1.298    | 0.0000   | 1.233          |                                                                                                                                                                                                                                                                                                                                                                                                                                                                                                                                                                                                                                                                                                                                                                                                                      |
| <b>C</b>                                                               | 1.260    | 1.233    | 0.0000         |                                                                                                                                                                                                                                                                                                                                                                                                                                                                                                                                                                                                                                                                                                                                                                                                                      |
| Intra-day dissimilarity<br>(original time series - KZ <sub>3,3</sub> ) |          |          | Interpretation |                                                                                                                                                                                                                                                                                                                                                                                                                                                                                                                                                                                                                                                                                                                                                                                                                      |
|                                                                        | <b>A</b> | <b>B</b> | <b>C</b>       | The intraday dissimilarity includes most of the random noise: since a different station is being zeroed at every hour, most of the noise appears in this time scale – the dissimilarity values are all greater than unity, indicating that most of the noise occurs at this time scale.                                                                                                                                                                                                                                                                                                                                                                                                                                                                                                                              |
| <b>A</b>                                                               | 0.0000   | 1.489    | 1.503          |                                                                                                                                                                                                                                                                                                                                                                                                                                                                                                                                                                                                                                                                                                                                                                                                                      |
| <b>B</b>                                                               | 1.489    | 0.0000   | 1.466          |                                                                                                                                                                                                                                                                                                                                                                                                                                                                                                                                                                                                                                                                                                                                                                                                                      |
| <b>C</b>                                                               | 1.503    | 1.466    | 0.0000         |                                                                                                                                                                                                                                                                                                                                                                                                                                                                                                                                                                                                                                                                                                                                                                                                                      |
| Diurnal dissimilarity<br>(KZ <sub>3,3</sub> – KZ <sub>13,5</sub> )     |          |          | Interpretation |                                                                                                                                                                                                                                                                                                                                                                                                                                                                                                                                                                                                                                                                                                                                                                                                                      |
|                                                                        | <b>A</b> | <b>B</b> | <b>C</b>       | The diurnal component is usually assumed to retrieve signals between 0.5 to 2.5 days. However, despite the <i>identical</i> diurnal signal present in all three original time series, the dissimilarity between all three time series remains high (the correlation remains low). The dissimilarity pairs ordered from lowest to highest are (A,C), (B,C), (A,B): the conclusion from this analysis would be that (A,C) are the most similar stations at this time scale, followed by (B,C) then (A,B). However, the temporal variation used to construct the time series is identical at this time scale – the band-pass methodology would lead to an erroneous conclusion. The low correlation is likely due to the lower frequency end of the band-pass including the time scale incorporating most of the noise. |
| <b>A</b>                                                               | 0.0000   | 1.032    | 0.8968         |                                                                                                                                                                                                                                                                                                                                                                                                                                                                                                                                                                                                                                                                                                                                                                                                                      |
| <b>B</b>                                                               | 1.032    | 0.0000   | 0.9458         |                                                                                                                                                                                                                                                                                                                                                                                                                                                                                                                                                                                                                                                                                                                                                                                                                      |
| <b>C</b>                                                               | 0.8968   | 0.9458   | 0.0000         |                                                                                                                                                                                                                                                                                                                                                                                                                                                                                                                                                                                                                                                                                                                                                                                                                      |
| Synoptic dissimilarity<br>(KZ <sub>13,5</sub> – KZ <sub>103,5</sub> )  |          |          | Interpretation |                                                                                                                                                                                                                                                                                                                                                                                                                                                                                                                                                                                                                                                                                                                                                                                                                      |
|                                                                        | <b>A</b> | <b>B</b> | <b>C</b>       | The synoptic component is usually assumed to retrieve signals between 2.5 and 21 days. The pairings here from lowest to highest dissimilarity are (B,C) < (C,A) < (A,B). The                                                                                                                                                                                                                                                                                                                                                                                                                                                                                                                                                                                                                                         |
| <b>A</b>                                                               | 0.0000   | 0.7909   | 0.7222         |                                                                                                                                                                                                                                                                                                                                                                                                                                                                                                                                                                                                                                                                                                                                                                                                                      |

|          |        |        |        |                                                                                                                                            |
|----------|--------|--------|--------|--------------------------------------------------------------------------------------------------------------------------------------------|
| <b>B</b> | 0.7909 | 0.0000 | 0.5286 | methodology has successfully identified the (B,C) pair as the most similar; from                                                           |
| <b>C</b> | 0.7222 | 0.5286 | 0.0000 | Table A1, this is correct – the weekly signal is identical for this pair. The other two pairs should be <i>equally</i> dissimilar based on |
|          |        |        |        | Table A1, but this is only true to the first digit in the band-pass analysis.                                                              |

| <b>Long-term dissimilarity</b>                   |        |        |        | <b>Interpretation</b>                                                                                                                                                                                                                                                                                                                                                                                                                                 |
|--------------------------------------------------|--------|--------|--------|-------------------------------------------------------------------------------------------------------------------------------------------------------------------------------------------------------------------------------------------------------------------------------------------------------------------------------------------------------------------------------------------------------------------------------------------------------|
| <b>(KZ<sub>103,5</sub> – KZ<sub>310,7</sub>)</b> |        |        |        |                                                                                                                                                                                                                                                                                                                                                                                                                                                       |
|                                                  | A      | B      | C      |                                                                                                                                                                                                                                                                                                                                                                                                                                                       |
| <b>A</b>                                         | 0.0000 | 0.8408 | 0.6003 | The long term dissimilarity is intended to isolate signals between 21 and 90 days. The Monthly signal from                                                                                                                                                                                                                                                                                                                                            |
| <b>B</b>                                         | 0.8408 | 0.0000 | 0.4364 | Table A1 should therefore be resolved by this analysis. From                                                                                                                                                                                                                                                                                                                                                                                          |
| <b>C</b>                                         | 0.6003 | 0.4364 | 0.0000 | Table A1, the (B,C) pair should have the greatest degree of similarity – and this is reflected in the analysis. (A,C) is shown to have a greater degree of similarity than (A,B). The periodicity differences between (A,C) and (A,B) should be identical, but the average value of the signals (A: 2.5, B: 5.0, C: 1.0) are likely why (A,C) has been identified as being more similar than (A,B). So at this time scale the results are reasonable. |

Table A3 suggests that the diurnal filter may be severely affected by energy leakage from other parts of the frequency spectrum, failing to identify the identical similarity in the diurnal signal constructed here (and indicating a low degree of similarity at that time scale in general). The synoptic dissimilarity correctly identified the most similar pair, but failed to give the remaining two pairs identical similarities, indicating that energy leakage from the adjacent bands are also present at this time scale. The long-term dissimilarity seems to have captured the main features of that signal; a combination of similarities in magnitude or phase lag of the monthly time series.

Table A4 provides the low-pass filter results for the filters described in Table A1 and Figure A1.

10 **Table A 4** 1-R values between pairs of test time series, for KZ low-pass filters.

| <b>Filters out time scales less than 1 day (KZ<sub>17,3</sub>)</b> |        |        |        | <b>Interpretation</b>                                                                                                                                                                             |
|--------------------------------------------------------------------|--------|--------|--------|---------------------------------------------------------------------------------------------------------------------------------------------------------------------------------------------------|
|                                                                    | A      | B      | C      |                                                                                                                                                                                                   |
| <b>A</b>                                                           | 0.0000 | 0.8236 | 0.7208 | The daily time (and shorter) variation has been removed. (B,C) are the most similar due to their identical weekly time series and time variation for the monthly time series. (A,B) are the least |
| <b>B</b>                                                           | 0.8236 | 0.0000 | 0.5282 | similar due to their difference in magnitude and period at both monthly and weekly time scales. (A,C) are intermediate due to                                                                     |
| <b>C</b>                                                           | 0.7208 | 0.5282 | 0.0000 | the similar period at monthly time scales and the relatively small                                                                                                                                |

size of the offset at weekly time scales.

| <b>Filters out time scales less than one week</b> |        |        |        | <b>Interpretation</b>                                                                                                                                                                                                                                                                                                                                                                                                                                                           |
|---------------------------------------------------|--------|--------|--------|---------------------------------------------------------------------------------------------------------------------------------------------------------------------------------------------------------------------------------------------------------------------------------------------------------------------------------------------------------------------------------------------------------------------------------------------------------------------------------|
| <b>(K<sub>95,5</sub>)</b>                         |        |        |        |                                                                                                                                                                                                                                                                                                                                                                                                                                                                                 |
|                                                   | A      | B      | C      |                                                                                                                                                                                                                                                                                                                                                                                                                                                                                 |
| <b>A</b>                                          | 0.0000 | 0.8455 | 0.6172 | The highest similarity is between (B,C), suggesting that the trend and the magnitude of the monthly signal dominates the similarity. (A,B) are the least similar, indicating that the monthly period offset between the signals and the difference in slope in the trend between these stations results in lower similarity than between (A,C). The intermediate values of the latter reflect the identical periods of the monthly signal and the identical slope in the trend. |
| <b>B</b>                                          | 0.8455 | 0.0000 | 0.4377 |                                                                                                                                                                                                                                                                                                                                                                                                                                                                                 |
| <b>C</b>                                          | 0.6172 | 0.4377 | 0.0000 |                                                                                                                                                                                                                                                                                                                                                                                                                                                                                 |

| <b>Filters out time scales less than 1 month</b> |        |        |        | <b>Interpretation</b>                                                                                                                                                                                                                                                                                                                                                                                      |
|--------------------------------------------------|--------|--------|--------|------------------------------------------------------------------------------------------------------------------------------------------------------------------------------------------------------------------------------------------------------------------------------------------------------------------------------------------------------------------------------------------------------------|
| <b>(KZ<sub>532,3</sub>)</b>                      |        |        |        |                                                                                                                                                                                                                                                                                                                                                                                                            |
|                                                  | A      | B      | C      |                                                                                                                                                                                                                                                                                                                                                                                                            |
| <b>A</b>                                         | 0.0000 | 0.2855 | 0.1083 | The dissimilarities are low (and hence the similarities are high) for all variable pairs. (A,C) are the most similar, reflecting the similarity in the magnitudes of these lines during the year. (B,C) are the next most similar pair, reflecting the similarity in the slopes. (A,B) are the least similar pair, reflecting the similarity in the slopes but the constant offset between this last pair. |
| <b>B</b>                                         | 0.2855 | 0.0000 | 0.2146 |                                                                                                                                                                                                                                                                                                                                                                                                            |
| <b>C</b>                                         | 0.1083 | 0.2146 | 0.0000 |                                                                                                                                                                                                                                                                                                                                                                                                            |

- The use of the KZ as a low-pass filter as in Table A4 has some advantages for the shorter time scales compared to the band-pass filters of Table A3 – the noise leakage from the short term variations has contaminated the band-pass filters for the diurnal signal, creating negative correlation coefficients, reducing correlations and obscuring the identical variation at that
- 5 time scale. The synoptic band-bass similarity also shows some energy leakage. The low-pass filters have removed the high frequency noise due to the choice of  $m$  and  $p$  values. The interpretation between band-pass and low-pass filters of course differs – the low-pass includes all frequencies less than the cut-off frequency (or all periods greater than the cut-off period), and must be interpreted in that context. Here we choose to use the low pass filters for our subsequent analysis, largely to avoid the high frequency noise and energy overlap issues shown above.
- 10 A McLauren series expansion of the sinusoids in Equation (A2), to the first two terms in the expansion for the numerator and denominator functions may be used to approximate the frequency energy cut-off- curves. If A is the fractional energy passed at a given frequency in the line, then that frequency may be approximated by:

$$\omega_0 \approx \frac{\sqrt{6}}{\pi} \sqrt{\frac{1-(A)^{\left(\frac{1}{2p}\right)}}{m^2-(A)^{\left(\frac{1}{2p}\right)}}} \quad (\text{A3})$$

where  $\omega_0$  is the desired separating frequency and the approximate solution to the equation

$$|\Phi_{m,p}(\omega)|^2 = A \quad (\text{A4})$$

A value of  $A = 1/2$  has been used in band-pass applications in the past to indicate the “boundaries” of these filters, though it can be seen from Figure A2(b) and Table A2 that the band-pass applications have significant energy leakage beyond these bounds.

## References

- Galmarini, S., Kioutsioukis, I., Solazzo, E.: E pluribus unum: ensemble air quality predictions, *Atmos. Chem. Phys.*, 13, 7153-7182, 2013.
- Kang, D., Hogrefe, C., Foley, K.L., Napelenok, S.L., Mathur, R., Rao, S.T.: Application of the Kolmogorov-Zurbenko filter and the decoupled direct 3D method for the dynamic evaluation of a regional air quality model, *Atmos. Environ.*, 80, 58-69, 2013.
- Hogrefe, C., Rao, S.T., Zurbenko, I.G., Porter, P.S.: Interpreting information in time series of ozone observations and model predictions relevant to regulatory policies in the eastern United States, *Bulletin of the American Meteorological Society* 81, 2083–2106, 2000.
- Hogrefe, C., Vempaty, S., Rao, S.T., Porter, P.T.: A comparison of four techniques for separating different time scales in atmospheric variables, *Atmos. Environ.*, 37, 3, 313-325, doi: 10.1016/S1352-2310(02)00897-X, 2003.
- Rao, S.T., Zurbenko, I.G., Neagu, R., Porter, P.S., Ku, J.Y., Henry, R.F.: Space and time scales in ambient ozone data, *Bull. Am. Meteorol. Soc.* 78, 2153-2166, 1997.
- Solazzo, E. and Galmarini, S.: Comparing apples with apples: Using spatially distributed time series of monitoring data for model evaluation, *Atmos. Environ.*, 112, 234–245, 2015.
